32 whitefly-begomovirus by stabilizing  $\beta$ C1, which interacts with  
33 PHYTOCHROME-INTERACTING FACTORS (PIFs) transcription factors. PIFs  
34 positively control plant defenses against whitefly by directly binding to the promoter  
35 of terpene synthase genes and promoting their transcription. Moreover, PIFs integrates  
36 light and jasmonate signaling by interaction with MYC2, and co-regulation the  
37 transcription of terpene synthase genes. However, begomovirus encoded  $\beta$ C1 inhibit  
38 PIFs' and MYC2' transcriptional activity via disturbing their dimerization, thereby  
39 impairing plant defenses against whitefly-transmitted begomoviruses. Our results thus  
40 describe how a viral pathogen hijacks host light signaling to enhance the mutualistic  
41 relationship with its insect vector.

## 42 **Author summary**

43 Climate change is driving disease rapidly spread, esp. for global distribution of  
44 insect-borne diseases. This paper reports red-light as an environmental factor to  
45 promote insect vector olfactory orientation behavior and increase viral disease  
46 transmission. Plant virus adapts the supplemental red lighting practice in modern  
47 agricultural greenhouse production under protection, therefore enhancing disease  
48 spreading globally.

## 49 **Introduction**

50 Climate change affect the emergence and spread of vector-borne infectious disease  
51 such as malaria, West Nile virus, Zika virus, and viral disease in staple crops via many  
52 ways [1, 2]. Rising global temperatures can push disease-carrying insects such as  
53 mosquitoes and whiteflies to move into new places that affect the transmission of

54 local viral pathogens [3]. Evidence suggests that crop production is threatened in  
55 complex ways by climate changes in the incidence of pests and pathogens [1, 2].  
56 Changed light condition also affects insect vector orientation and therefore feeding  
57 behavior. Arthropod-borne viruses (arboviruses) cause diseases in human and crops,  
58 and rely on their vectors for transmission and multiplication [4, 5]. The distribution  
59 and population size of disease vectors can be heavily affected by local climate and  
60 light conditions. Beside of direct effecting fitness of their vectors, plant pathogens  
61 confer indirect effects on their vectors often by manipulating the plant defenses  
62 against the vector, e.g. volatile chemical components. These volatile substances act as  
63 olfactory clues, but also host-finding cues, defensive substances even sex pheromones  
64 [6, 7]. Many of insect-borne plant pathogens, e.g. arboviruses of the families  
65 *Geminiviridae*, are capable of achieving indirect mutualistic relationships with vectors  
66 via their shared host plant [8-10].

67 To cope with these environmental changes, sessile plants have evolved integrated  
68 mechanisms to respond these complex stress conditions, minimizing damages, while  
69 conserving valuable resources for growth and reproduction [11-13]. As an energy  
70 source and a key environmental factor, light influences plant growth, defense, and  
71 even ecological structure [14, 15]. The perception of light signals by phytochrome  
72 photoreceptors initiates downstream signaling pathways and regulates numerous plant  
73 processes during growth and defense [16]. The *Arabidopsis thaliana*  
74 PHYTOCHROME INTERACTING FACTORS (PIFs) are a class of basic  
75 helix-loop-helix (bHLH) transcription factors in *Arabidopsis*, which interact with the

76 active photoreceptors to optimize plant growth and development [17-19].

77 Exogenous light signals integrated with endogenous signals from defense  
78 hormones such as jasmonate (JA) and salicylic acid in plant, mediate plant defense  
79 responses [14]. These defensive arsenals often produce a blend of ecologically  
80 important volatile chemicals such as terpenoids releasing to the environment, and  
81 counter the herbivore attack including vectors such as whitefly and aphid [14, 20].  
82 The downstream bHLH transcription factor MYC2 controls the production of some  
83 secondary metabolites, which can function as olfactory cues for insects, e.g.  
84 terpenoids and glucosinolates [21-24]. Although light is known to regulate plant  
85 growth and defense against insects and pathogens [25], how light affects host  
86 interaction with herbivore and pathogens has not been described in detail.

87 Begomovirus, the largest genus of plant viruses and transmitted exclusively by  
88 whitefly, have evolved strategies to manipulate JA-regulated plant olfactory cues to  
89 promote their mutualism with whitefly vectors [9, 22, 26]. For example, the  
90 begomovirus *Tomato yellow leaf curl China virus* (TYLCCNV), which possesses only  
91 the DNA-A component with a betasatellite (TYLCCNB), is a whitefly-transmitted  
92 begomovirus that results in epidemic diseases in tomato, tobacco and other crops  
93 [27-29]. These host plants produce volatile terpenoids as olfactory repellents against  
94 whitefly [22, 26, 30]. We have previously shown that the TYLCCNB encoded a  $\beta$ C1  
95 protein suppresses the transcriptional activation-activity of MYC2 by interfering with  
96 its dimerization, leading to reduced transcription of *TERPENE SYNTHASE (TPS)*  
97 genes and terpenoid biosynthesis and anti-herbivory glucosinolates biosynthesis,

98 thereby establishing an indirect mutualistic relationship between the pathogen and the  
99 vector [22]. Whether and how climate condition such as light affects this mutualism  
100 between begomovirus and whitefly herbivore has not been characterized.

101 Here, we report red-light as an environmental catalyzer to promote mutualism of  
102 whitefly-begomovirus by stabilizing begomovirus-encoded  $\beta$ C1. The family of  
103 multiple signaling integrator PIFs is a new key target of the viral  $\beta$ C1 protein.  $\beta$ C1  
104 protein hijacks two kinds of bHLH transcription factors (MYC2 and PIFs) to decrease  
105 the transcription of *TPSs* genes that are expected to reduce terpene biosynthesis. Our  
106 results show that a begomovirus establishes an indirect mutualistic relationship with  
107 whitefly vector by modulating red light and JA signaling-mediated plant defense.

## 108 **Results**

### 109 **Environment red-light is indispensable for betasatellite-encoded $\beta$ C1 protein to** 110 **promote host whitefly attraction**

111 To detect whether light affects the natural begomoviral transmission process, we  
112 performed whitefly two-choice experiments using *Nicotiana benthamiana* (*Nb*) plants  
113 and *Nb* plants infected with TYLCCNV and its associated betasatellite (TYLCCNB)  
114 (TA+ $\beta$ ) in light and dark conditions (Fig 1A). Consistent with our previous report [22],  
115 whiteflies showed a significant preference for TA+ $\beta$ -infected plants to uninfected *Nb*  
116 plants under white light (Fig 1B). Interestingly, the whiteflies did not show preference  
117 for TA+ $\beta$ -infected plants under darkness (Fig 1B). We previously demonstrated that  
118  $\beta$ C1 protein encoded by TYLCCNB is involved in host preference of whitefly [22].  
119 More whiteflies were attracted to TA+ $\beta$ -infected plants compared with the  $\beta$ C1

120 betasatellite mutant virus (TA+m $\beta$ )-infected plants under white light, but there were  
121 no significant changes of whitefly preference between TA+ $\beta$ -infected plants and  
122 TA+m $\beta$ -infected plants under darkness (Fig 1B), suggesting that the viral  
123  $\beta$ C1-mediated whitefly preference is light-dependent.

124 We next performed whitefly two-choice assays using  $\beta$ C1 transgenic Nb plants  
125 ( $\beta$ C1/Nb) in various light conditions. Due to the complicity of the tripartite  
126 interactions, we applied monochromatic red-light to represent high red: far-red (R:FR)  
127 light ratio and also far-red light to represent low R: FR, the latter mimics the poor  
128 light condition of plant competition for light. Different monochromatic light sources  
129 were used to determine which wavelength of light is essential for whitefly attraction.  
130 Whiteflies were more attracted to the  $\beta$ C1/Nb plants compared to wild-type Nb plants  
131 only under red light and white light, not in darkness, far-red light and blue light (Fig  
132 1C and S1A Fig). Moreover, red light-induced whitefly attraction from  $\beta$ C1/Nb plants  
133 was disrupted by far-red light (Fig 1C and S1A Fig). These whitefly preference results  
134 under monochromatic lights agree with the field experiments [31], which encouraged  
135 us to design other experiments for explicit mechanisms of light effect on the tripartite  
136 interactions. To further confirm these results with another host plant, transgenic  
137 *Arabidopsis* plants expressing  $\beta$ C1 ( $\beta$ C1/At) were used to perform whitefly  
138 two-choice assays and the same result as in  $\beta$ C1/Nb plants was observed (Fig 1D).  
139 Moreover, wild-type Col-0 plants under red light conferred stronger repellence to  
140 whitefly than that under darkness on wild-type Col-0 plants (S2A Fig). These results  
141 demonstrate that red light plays a crucial role in whitefly preference for

142  $\beta C1$ -expressing plants.

143 Hemipterans lack red light photoreceptors, so red light likely cannot directly  
144 affect whitefly behaviors [32, 33]. We thus hypothesized that signals from the host  
145 plant mediates the red light-induced changes in whitefly preference for plants  
146 expressing  $\beta C1$ . Our previous work showed that TYLCCNB  $\beta C1$  contributes to the  
147 suppression of JA-regulated terpene biosynthesis and renders virus-infected plant  
148 more attractive to its whitefly vector [22]. Therefore, we examined the expression  
149 levels of *TPS* genes under various monochromatic light conditions in *Arabidopsis*.  
150 Only red light could induce the  $\beta C1$ -mediated suppression of *AtTPS10*, *AtTPS14*, and  
151 *AtTPS21* expression (Fig 1E and S1B, S1C Fig). We also found that red light induced  
152 higher expression of *AtTPS10* than darkness (S2B Fig). These results revealed that  
153  $\beta C1$  inhibits the transcription of *TPS* genes in a red light-dependent manner.

#### 154 **Environment red-light stabilizes $\beta C1$ protein in plants**

155 To explore the potential mechanism underlying the interaction between  $\beta C1$  and plant  
156 signaling under various light conditions, we first excluded the possible roles of light  
157 on the subcellular localization of  $\beta C1$  protein or its transcript levels (S3 Fig). We  
158 found that the abundance of  $\beta C1$  was higher under red light than under darkness,  
159 far-red light and blue light (Fig 2A). The profile of protein accumulation offered an  
160 explanation for the  $\beta C1$ -induced host preference in a red-light dependent manner.

161 To further determine the effects of light signals on  $\beta C1$  stability, Nb plants  
162 transiently expressing  $\beta C1$  were transferred from white light into monochromatic light  
163 boxes and sampled at designated time intervals (Fig 2B-D). The accumulation of  $\beta C1$

164 sharply decreased under darkness and in far-red light (Fig 2B and 2D). The half-life of  
165  $\beta$ C1 protein was approximately 6 h under darkness and decreased to 2 h under far-red  
166 light, suggesting that far-red light signal promotes the degradation of  $\beta$ C1 protein. The  
167 protein stability of  $\beta$ C1 protein under red light was much higher than under other  
168 monochromatic light and dark condition (Compare Fig 2C with 2B and 2D).  
169 Furthermore, we detected the accumulation of  $\beta$ C1 protein in two stable transgenic  
170 *Arabidopsis* lines expressing  $\beta$ C1 (*35S:myc- $\beta$ C1* #1 and #2). The results show that  
171 compared to darkness, white light or red light promotes the stability of  $\beta$ C1 protein in  
172 stable transgenic plants (S4 Fig). These results further support a conclusion that red  
173 light promotes the stability of  $\beta$ C1.

#### 174 **$\beta$ C1 interacts with PIFs**

175 To explore how light signal influences  $\beta$ C1 stability and  $\beta$ C1-induced whitefly  
176 attraction, we used a yeast two-hybrid system to screen for  $\beta$ C1 interactors in an  
177 *Arabidopsis* cDNA library. This identified AtPIF3, which was first identified to act in  
178 the light transduction pathway and later as multiple signaling integrator [34], as a new  
179  $\beta$ C1-targeted host factor. We next confirmed that  $\beta$ C1 interacts with all four of the  
180 *Arabidopsis* PIF-quartet proteins (AtPIF1, AtPIF3, AtPIF4, or AtPIF5) by yeast-two  
181 hybrid and bimolecular fluorescence complementation (BiFC) assays (Fig 3A and 3B),  
182 further co-immunoprecipitation (CoIP) assay confirmed the interaction between  $\beta$ C1  
183 and AtPIF3 *in vivo* (Fig 3C). Taken together, these data suggest that  $\beta$ C1 interacts  
184 with PIFs in plants.

185 PIFs contain a conserved bHLH domain that binds to DNA and mediates



186 dimerization with other bHLH transcription factors to regulate downstream signaling,  
187 and another Active Phytochrome A/B-binding domain that interacts with phyA and  
188 phyB to sense upstream signaling [19]. We further showed that  $\beta C1$  interacts with the  
189 bHLH domain of AtPIF3 (S5 Fig), indicating that the interaction between  $\beta C1$  and  
190 PIFs may influence the downstream signaling integrator roles of PIFs in cells.

### 191 **The PIFs mediate defense against whitefly in *Arabidopsis***

192 To investigate whether PIFs are involved in plant defense against insect vectors, we  
193 performed whitefly bioassays using Col-0 and *AtPIF3*-overexpressing (*AtPIF3-OE*)  
194 transgenic plants. Whiteflies laid fewer eggs and exhibited slower pupa development  
195 on *AtPIF3-OE* transgenic plants than that on Col-0 plants (Fig 4A and 4B).  
196 Conversely, they laid more eggs and exhibited faster pupa development on *pifq*  
197 (*pif1/3/4/5*) quadruple mutant than that on Col-0 plants (Fig 4C and 4D), an  
198 observation is similar to that with  $\beta C1$ -expressing *Arabidopsis* plants [22]. These data  
199 suggest that PIFs are involved in plant defense against whitefly vector.

200 Since TYLCCNB  $\beta C1$  involved in whitefly preference under white light (Fig 1)  
201 and interacts with plant PIFs (Fig 3), we performed whitefly two-choice assays to  
202 examine whether the PIFs have the same effects on whitefly preference as  $\beta C1$ .  
203 Consistent with the results with  $\beta C1$ -expressing *Arabidopsis* plants, the *pifq*  
204 quadruple mutants were higher attractive to whiteflies than Col-0 plants under white  
205 or red light (Fig 4E). The transcriptional levels of *TPS* genes (*AtTPS10*, *AtTPS14* and  
206 *AtTPS21*) were significantly repressed in the *pifq* mutant compared to those in Col-0  
207 plants under white or red light (Fig 4F-H). Taken together, these results imply that

208 transgenic expression of  $\beta C1$  partially mimics the *pifq* mutant, which hinders the plant  
209 terpene-based resistance to whitefly.

### 210 **$\beta C1$ suppresses PIFs activity by interfering with its dimerization**

211 PIFs are bHLH transcription factors that directly regulate gene expression by binding  
212 to a core G-box motif (CACGTG) and G-box-like motif (CANNTG) [34, 35]. We  
213 wonder whether PIFs directly regulate the expression of *TPS* genes and involve in the  
214 terpene-mediated whitefly defense response. There are five G-box-like elements  
215 (CANNTG) in the promoter of *AtTPS10*, distributed in three regions (Fig 5A). We  
216 performed a chromatin immunoprecipitation (ChIP) assay using *AtPIF3-OE* plants.  
217 Quantitative PCR analysis showed that region II (one G-box-like motif 0.7 kb  
218 upstream of the transcription start site) of *AtTPS10* was significantly enriched in  
219 *AtPIF3-OE* lines relative to Col-0 plants (Fig 5B). These data indicate that AtPIF3  
220 directly binds to the promoter of *AtTPS10* and regulates its expression in *Arabidopsis*.

221 PIF3 activates downstream gene expression by forming homodimers and  
222 heterodimers with other PIF-related bHLH transcription factors [19]. The interaction  
223 between  $\beta C1$  and the bHLH domain of AtPIF3 (S5 Fig) raised the possibility that  $\beta C1$   
224 competes with the bHLH domain to interfere with AtPIFs dimerization. A modified  
225 BiFC assay was used to test this hypothesis. In cells co-expressing  $\beta C1$ , the  
226 interaction signal strength of AtPIF3-AtPIF3 or AtPIF3-AtPIF4 decreased to  
227 approximately half of its original intensity (Fig 5C-E), suggesting that  $\beta C1$  may  
228 interfere with PIF dimerization. Moreover, *in vitro* competitive pull-down assays  
229 showed that  $\beta C1$  interferes with homodimerization of AtPIF4-AtPIF4 and

230 heterodimerization of AtPIF3-AtPIF4 (Fig 5F and 5G).

231 Next, we examined whether  $\beta$ C1 affects the trans-activity of PIFs via a construct  
232 containing the *AtTPS10* promoter with *luciferase* (*LUC*) as a reporter, and  
233 YFP-AtPIFs (AtPIF1, AtPIF3, AtPIF4, or AtPIF5) as effectors. *AtTPS10* promoter:  
234 *LUC* was transiently expressed with the indicated effector plus  $\beta$ C1 in Nb leaf cells.  
235 Fig 5H shows that each of AtPIFs (AtPIF1, AtPIF3, AtPIF4, and AtPIF5) significantly  
236 increased the LUC activity, whereas  $\beta$ C1 decreased AtPIFs-induced LUC activity at  
237 different degrees (Fig 5H). Taken together, these results indicate that  $\beta$ C1 attenuates  
238 the trans-activity of AtPIFs in promoting *AtTPS10* transcription by inhibiting PIF  
239 dimerization.

#### 240 **Light and JA signals coordinately regulate host preference of whitefly**

241 PIF-quartet integrates signals from multiple signaling pathways, including light and  
242 JA signals, to respond to the diverse stresses and developmental processes [19, 34, 36].  
243 Previous study has reported that AtPIF4 interacts with AtMYC2, and JA inhibits the  
244 function of PIF4 partially through MYC2 in *Arabidopsis* [37]. To confirm that JA and  
245 light signaling work cooperatively to regulate plant defense against whitefly, we  
246 firstly investigated whether MYC2 associates with PIFs in plants. BiFC assays  
247 showed that AtMYC2 interacts with AtPIF3 and AtPIF4 (S6 Fig). Additionally, we  
248 generated a *pifq/myc2-1* mutant by crossing the *pifq* mutant with the *myc2-1* mutant.  
249 The transcriptional levels of *AtTPS10* in the *pifq/myc2-1* mutant were additively  
250 reduced compared to the parental lines under red light conditions (Fig 6A). The  
251 results suggest that AtPIFs and AtMYC2 coordinately regulate the expression of

252 *AtTPS10*. Since the individual AtPIF4 or AtMYC2 could directly bind and promote  
253 *AtTPS10* expression, we next tested whether the AtPIF4-AtMYC2 interaction has  
254 synergetic effect on downstream genes expression regulation. Unexpected, we found  
255 that the heterdimerazation of AtPIF4-AtMYC2 in fact even reduces the transactivation  
256 activity when co-expressed with AtPIF4 and AtMYC2 compared to AtMYC2 alone  
257 under white light (Fig 6B), indicating an antagonistic effect of heterodimer formation  
258 of AtPIF4-AtMYC2 on expression of *AtTPS10*.

259 Next we tested the effect of viral  $\beta$ C1 on the AtPIF4-AtMYC2 interaction and  
260 found that the interaction signal of AtPIF4-AtMYC2 was increased by two-fold when  
261 co-expressed with  $\beta$ C1, but not with  $\beta$ -glucuronidase (GUS) (Fig 6C and 6D),  
262 suggesting that  $\beta$ C1 function as a linker between two bHLH transcription factors  
263 AtPIF4 and AtMYC2. Competitive pull-down assay also supported the idea that  $\beta$ C1  
264 indeed bridges the interaction of AtPIF4-AtMYC2 (Fig 6E). One hypothesis was then  
265 raised that the self-interaction of AtPIFs or AtMYCs promotes their transcriptional  
266 activity, but the formation of heterodimer of AtPIF4-AtMYC2 inhibits the MYC2  
267 transcriptional activity. Once plants are infected by begomovirus, the linker- $\beta$ C1 even  
268 exacerbates their activities. For that end, we coexpressed  $\beta$ C1 and found that  $\beta$ C1  
269 could dampen the activator activities either by single AtPIF4 or AtMYC2 or  
270 coexpression of these two bHLH transcription factors (Fig 6B).

271 To further explore the function of JA signals in  $\beta$ C1- or PIFs-mediated whitefly  
272 host preference, we performed whitefly two-choice assays using  $\beta$ C1-expressing and  
273 *pifq* mutant plants with MeJA treatment in darkness. The loss of whitefly preference

274 for  $\beta C1/At$  and *pifq* mutant plants under darkness was rescued by MeJA application  
275 (Fig 7A and 7B). Accordingly, the expression levels of *AtTPS10*, *AtTPS14* and  
276 *AtTPS21* in two  $\beta C1/At$  lines and *pifq* plants were also dramatically decreased by  
277 MeJA under darkness (Fig 7C-H). These results demonstrate that JA and light signals  
278 integrally modify begomovirus-whitefly mutualism.

## 279 **Discussion**

280 As the Earth warms, we need to be able to predict what conditions will be at risk for  
281 infectious diseases because prevention is always superior to reaction. The disease  
282 triangle, pathogen-host-environment, is used to understand how disease epidemics can  
283 be predicted, restricted or controlled [38]. Evidence is increasing suggesting that  
284 environmental factors including light are important mediators of plant defenses during  
285 plant-pathogen interactions [14, 34]. However, the ability of plant pathogens in using  
286 effectors to disturb or co-opt host light signaling to promote infection has not been  
287 well explored. Plant defense signals function as players or pawns in plant-virus-vector  
288 interactions [39], PIFs are key signal integrators in regulating plant growth and  
289 development [16, 34]. Here, we provide evidence showing that PIFs act as direct  
290 positive regulators in plant defense against whitefly vector. First, the  
291 *AtPIF3*-overexpression confers enhanced *Arabidopsis* resistance to whitefly, and PIFs  
292 deficiency in *pifq* mutant promotes whitefly performance in *Arabidopsis* (Fig 4A-4D).  
293 Second, the *pifq* quadruple mutants attract more whiteflies than Col-0 plants under  
294 white or red light (Fig 4E). Therefore, PIF is not only directly involved in plant  
295 development, but also involved in resistance against vector insects. However,

296 begomoviral  $\beta$ C1 protein performs a successful counter-defense by hijacking PIFs  
297 proteins. On the one hand,  $\beta$ C1 interacts with PIFs and suppresses trans-activity of  
298 PIFs by interfering with its dimerization (Fig 3 and Fig 5); on the other hand,  $\beta$ C1  
299 utilizes whitefly vector to decrease the *PIFs* transcription induced by begomovirus in  
300 host plants (S7 Fig). Consequently, begomovirus suppresses PIFs-mediated plant  
301 defense to enhance vector transmission.

302 Most of plant arboviruses attract their insect vectors by modulating plant  
303 host-insect vector specific recognition. Light modulates communications of  
304 plant-insect through a combination of olfactory and visual cues comprehensively [14,  
305 40]. Similarly as our current results, red light seems essential for a terpenoid volatile  
306 based-attraction to Huanglongbing host plant for the vector insect Asian Citrus Psyllid,  
307 which transmits the casual bacterial pathogen *Candidatus Liberibacter* [41]. MYC2  
308 and its homologs have been characterized as a few known regulators in terpene  
309 biosynthesis mainly during day time [21-23], since it stabilizes by light but  
310 destabilizes in darkness [42]. A recent study demonstrated that the MYC2 protein in  
311 JA signaling pathways interacts with PIF4 [37]. Here, we likewise show that AtPIF3  
312 and AtPIF4 all interact with AtMYC2, and *AtTPS10* expression was significantly  
313 reduced in *pifq/myc2-1* quintuple mutant compared with parental single *pifq* or  
314 *myc2-1* mutant (Fig 6A). Meanwhile transcript accumulation of *TPS* genes (*AtTPS10*,  
315 *AtTPS14* and *AtTPS21*) does not show a circadian rhythm in *Arabidopsis* (S8A Fig).  
316 The expression of PIFs and MYCs was complemented and balanced regulation (S8B  
317 Fig and S8C Fig). These results suggest that PIFs and MYC2 synergistically regulate

318 terpene biosynthesis in two paralleled pathways. Furthermore, the mechanism of  
319 PIFs-regulated *TPS* genes expression in dark is complementary to the  
320 MYC2-regulated counterpart in light. Since PIFs are much stable in the night, PIFs  
321 may control the ecological interactions of plant-insects in night by regulating the  
322 chemical communication, esp. for these night blooming plants and behaviors of  
323 nighttime feeding insects [43]. In addition, PIF-like genes are highly conserved and  
324 they have been existed before the water-to-land transition of plants [16, 44]. It will be  
325 of interest to examine possible defensive roles in PIF homologs in other plants. Our  
326 findings indicate prospects for biotechnological improvement of crops to improve  
327 yield and immunity simultaneously through editing and regulation of *PIFs* genes.

328 Under red light, PIFs levels/activities are expected to be low in wild-type plants,  
329 because PIFs are inactivated by phyB. phyB is the predominant photoreceptor  
330 regulating photomorphogenic responses to red light, while phyA is the primary  
331 photoreceptor responsible for perceiving far-red light [45, 46]. Our results show that  
332 the accumulation of  $\beta$ C1 protein was higher in red light than that in far-red light (Fig  
333 2A). Interestingly, when we treated the Nb plants transiently expressed myc- $\beta$ C1  
334 protein with continuous red light and far-red light, the  $\beta$ C1 protein was accumulated  
335 in red light, but decreased in far-red light (S9 Fig). When the plants in red light again,  
336  $\beta$ C1 protein accumulation has no obvious changes, but reduced again when treated  
337 with far-red light (S9 Fig). These results further proved that red light could maintain  
338 the stability of  $\beta$ C1 protein, but far-red light promote the degradation of  $\beta$ C1 protein,  
339 which imply that the photoreceptors phyB or phyA might involve in regulation of  $\beta$ C1

340 stability. This hypothesis needs further research.

341 Modern anti-arbovirus strategy includes anti-insect netting to disrupt disease  
342 transmission. Also more and more countries have adapted greenhouse crop production  
343 under protected condition in the past decades. In northern countries this practice often  
344 relies heavily on supplemental lighting for year-round yield and product quality.  
345 Among the different spectra used in supplemental lighting, red light is often  
346 considered the most efficient [2]. It seems like that begomovirus could adapt these  
347 serial artificial environmental changes by evolving new role of a known virulence  
348 factor to hijack host internal light signaling. Plant viruses have a small genome in  
349 which the encoding proteins especially the virulence factors are frequently  
350 multifunctional.  $\beta$ C1 proteins are multifunctional and has many host targets for its  
351 pathogenesis [29, 47], many of which may impact plant-virus and plant-whitefly  
352 interactions. It is necessary to further dissect whether and how other targets of  $\beta$ C1 are  
353 also involved in this light-dependent virus pathogenicity in the future. Meanwhile, the  
354 data collected here and conclusion we made is based on well-controlled  
355 monochromatic light conditions. When extrapolating to natural and agricultural field  
356 conditions, it should seriously take into account the real light quality within dense  
357 stands in the begomovirus-whitefly-plant tripartite interactions. Nevertheless, our data  
358 here is significant for understanding of the tripartite interactions and also for arbovirus  
359 disease controlling, esp. begomoviral  $\beta$ C1 is adapted to red-light condition, which  
360 represents a good light quality, to suppress phytohormone-regulated terpene  
361 biosynthesis to attract whitefly insect.



362 The results in this study can be best summarized by the working model presented  
363 in S10 Fig. In this model, homodimerized PIFs or MYC2 binds to the promoter  
364 regions of *TPS* genes, resulting in increased *TPS*s transcript levels and terpene  
365 biosynthesis. Thus red-light signal and JA signal fine-tune transcription of *TPS* genes  
366 to contribute to resistance to whiteflies in uninfected plants (S10A Fig). In  
367 begomovirus-infected plants,  $\beta$ C1 inhibits transcriptional activity of PIFs and MYC2  
368 by interfering with their homodimerization and promoting AtPIFs-AtMYC2  
369 heterodimerization. Finally, the decreased terpene synthesis and in turn enhanced  
370 whitefly performance increase the probability of pathogen transmission (S10B Fig).

## 371 **Materials and Methods**

### 372 **Plant materials and growth conditions**

373 Wild-type or transgenic *Nicotiana benthamiana* plants carrying *35S: $\beta$ C1* have been  
374 reported previously [22, 48]. *N. benthamiana* plants grew in an insect-free growth  
375 chamber at 25°C with 12 h light/12 h darkness cycle. *Arabidopsis thaliana* wild-type  
376 Col-0, *pifq* (*pif1/3/4/5*) [49], *myc2-1* mutant [50], and  $\beta$ C1/At [22] were used in the  
377 study. Quintuple *pifq/myc2-1* mutant was generated by crossing the corresponding  
378 parental single *myc2-1* and quadruple *pifq* homozygous lines. The construct  
379 expressing *35S:YFP-AtPIF3* was transformed into Col-0 plants, and generated  
380 *AtPIF3*-overexpressing lines (*AtPIF3-OE*). Sterilized seeds were incubated on  
381 Murashige and Skoog medium at 4°C for 3 d before being transferred to a growth  
382 chamber (22°C with 10 h of light/14 h of darkness cycle).

383

384 **Plant treatments**

385 For whitefly two-choice assays and *Arabidopsis* TPSs expression analysis, plants were  
386 placed in darkness for 24 h, followed by a 2-h light exposure for two-choice assays.  
387 White light, blue light, red light, and far-red light were supplied by LED light sources,  
388 the irradiance fluency rates was, white light ( $80 \mu\text{mol m}^{-2} \text{sec}^{-1}$ ), blue light ( $15 \mu\text{mol}$   
389  $\text{m}^{-2} \text{sec}^{-1}$ ), red light ( $20 \mu\text{mol m}^{-2} \text{sec}^{-1}$ ), and far-red light ( $2 \mu\text{mol m}^{-2} \text{sec}^{-1}$ ). Light  
390 intensity was measured with an OHSP-350C illumination spectrum analyzer.

391 For phytohormones treatments, methyl jasmonate (MeJA) was used to mimic  
392 whitefly infestation in *N. benthamiana* and *Arabidopsis* [22]. Three week-old  
393 *Arabidopsis* were sprayed with 100  $\mu\text{M}$  MeJA containing 0.01% (v/v) Tween 20.  
394 Plant samples were collected at 6 h following treatment. Control plants were treated  
395 with 0.01% (v/v) Tween 20 in parallel for the same time period.

396 **Virus inoculation**

397 *N. benthamiana* plants with four to six true leaves were infiltrated with  
398 *Agrobacterium tumefaciens* carrying TYLCCNV and betasatellite DNA $\beta$  (isolate Y10)  
399 as described previously [22, 51]. Infiltration with buffer or TYLCCNV plus a mutant  
400 betasatellite DNA with a  $\beta\text{C1}$  mutation (TA+m $\beta$ ) was used as a control [51].

401 **Whitefly bioassays**

402 Whiteflies were collected in the field in Chaoyang District, Beijing, China and were  
403 identified as *Bemisia tabaci* MEAM1, B biotype (mtCOI, GenBank accession number  
404 MF579701). The whitefly population was maintained in a growth chamber (25°C, 65%  
405 RH) on cotton with a 12 h-light/12 h-dark light cycle.

406 The whitefly two-choice experiments were performed as described previously  
407 [22]. Two plants of selected genotypes with similar size and leaf numbers were firstly  
408 kept in darkness for 24 h, and then exposed to specific light for 2 h, and finally placed  
409 in an insect cage (30\*30\*30 cm) with the same light condition. Two hundred adult  
410 whiteflies were captured, and then released from the middle of the two plants. After  
411 20 min, the whiteflies settled on each plant were recaptured and the number on each  
412 plant was recorded. Six biological replicates were conducted in this experiment.

413 For whitefly oviposition experiment, three female and three male whitefly adults  
414 were released to a single leaf encircled by a leaf cage (diameter, 45 mm; height, 30  
415 mm). All the eggs on the *Arabidopsis* leaves were counted with a microscope after 10  
416 d, and the number of eggs deposited per female was determined. Eight biological  
417 replicates were conducted in this experiment.

418 For the whitefly development experiment, 16 female adults were inoculated to a  
419 single leaf encircled by a leaf cage. After 2 d of oviposition, all adults were removed,  
420 and the eggs were allowed to develop. All pupae on the *Arabidopsis* leaves were  
421 counted with a microscope after 22 d, and the number of pupae per female was  
422 determined. Eight biological replicates were conducted in this experiment.

### 423 **Yeast two-hybrid analysis**

424 The *Arabidopsis* Mate and Plate Library were used (Clontech, 630487). Full-length  
425 protein for  $\beta$ C1 was cloned into the pGBT9 vector to generate BD- $\beta$ C1 construct.  
426 This was then used to screen against the full yeast library via the yeast mating system  
427 following the manufacturer's protocol (Matchmaker Gold Yeast Two-Hybrid System,

428 Clontech). To further confirm the interaction between  $\beta$ C1 and AtPIFs, full-length of  
429 *Arabidopsis* PIFs was cloned into the pGAD424 vector through LR reaction to  
430 generate AD-AtPIFs. The yeast strain Y2HGold was co-transformed with BD- $\beta$ C1  
431 and AD-AtPIF1/PIF3/PIF4/PIF5 constructs and plated on SD-Leu-Trp selective  
432 dropout medium. Colonies were transferred onto SD-Leu-Trp-His plates to verify  
433 positive clones. The empty vectors pGBT9 and pGAD424 were used as negative  
434 controls.

#### 435 **Bimolecular fluorescence complementation (BiFC)**

436 Fluorescence was observed owing to complementation of the  $\beta$ C1 fused with the  
437 C-terminal part of EYFP with one of PIFs fused with the N-terminal part of EYFP.  
438 Unfused nEYFP was used as a negative control. Leaves of 3-week-old *N.*  
439 *benthamiana* plants were infiltrated with *Agrobacterium* cells containing the constructs  
440 designed for this experiment. Two days after infiltration, fluorescence and DAPI  
441 staining were observed by confocal microscopy. Three independent plants were tested  
442 in one experiment. The experiment was repeated twice with similar results.

#### 443 **Co-immunoprecipitation (Co-IP) assay**

444 *A. tumefaciens* strains containing expression vectors of *35S::YFP* and *35S::AtPIF3-HA*,  
445 *35S::YFP- $\beta$ C1* and *35S::AtPIF3-HA*, or *35S::YFP- $\beta$ C1* and *35S::AtMYC2-HA* were  
446 co-injected into 3-week-old *N. benthamiana* leaf cells. YFP was used as negative  
447 control, and AtMYC2-HA was used as positive control. After infiltration, plants were  
448 maintained in the dark (in order to stabilize PIFs) for 2 d before protein extraction  
449 [52]. Total proteins were extracted from infiltrated leaf patches in 1 ml lysis buffer [50

450 mM Tris-HCl pH7.4, 150 mM NaCl, 2 mM MgCl<sub>2</sub>, 10% glycerol, 0.5% NP-40, 1 mM  
451 DTT, protease inhibitor cocktail (Roche, 32147600)]. Fifty milligram protein extracts  
452 were taken as input, and then the rest extracts were incubated with the GFP-Trap  
453 beads (ChromoTek, gta-20) for 1.5 h at 4°C. Immunoblotting was performed with  
454 anti-HA and anti-GFP antibodies (TransGen Biotech, HT801-02).

#### 455 **Pull-down protein competitive interaction assay**

456 The GST- and MBP-fusion proteins were separately purified using Glutathione  
457 sepharose (GE Healthcare, 17-5132-01) and Amylose resin (New England Biolabs,  
458 E8021S) beads as according to the manufacturer's instructions. His-βC1 fusion  
459 proteins were purified using Ni-nitrilotriacetate (Ni-NTA) agarose (Qiagen, 30210)  
460 according to the manufacturer's instructions. Indicated amounts of GST or His-βC1  
461 were mixed with 2 μg of MBP-fusion proteins and 50 μL of Amylose resin overnight.  
462 After two washes with binding buffer (50 mM Tris-HCl, pH 7.5, 100 mM NaCl, 35 mM  
463 β-mercaptoethanol and 0.25% Triton X-100), 2 μg of GST-fusion proteins were added  
464 and the mixture was incubated for 3 h at 4°C. Beads were washed 6 times with binding  
465 buffer. The associated proteins were separated on 8 % SDS-polyacrylamide gels and  
466 detected by immunoblots using anti-GST antibody (TransGen Biotech, HT601-02).

#### 467 **Quantitative RT-PCR**

468 Total RNA was isolated using the RNeasy Plant Mini Kit (Qiagen, 74904), and 2000  
469 ng of total RNA for each sample was reverse transcribed using the TransScript  
470 One-Step gDNA Removal and cDNA Synthesis SuperMix (TRAN, AT311-03). Three  
471 independent biological samples, each from an independent plant, were collected and

472 analyzed. RT-qPCR was performed on the CFX 96 system (Bio-Rad) using  
473 Thunderbird SYBR qPCR mix (TOYOBO, QPS-201). The primers used for mRNA  
474 detection of target genes by real-time PCR are listed in Table S1. The *Arabidopsis*  
475 *Actin2* (At3g18780) mRNA was used as internal control.

#### 476 **ChIP assay**

477 Transgenic *Arabidopsis* plants expressing *35S:YFP-AtPIF3* and wild-type control  
478 Col-0 were used for ChIP assays. *Arabidopsis* seedlings were grown on MS medium  
479 for 12 days. 2.5 g of seedlings were harvested and fixed in 37 ml 1% formaldehyde  
480 solution under a vacuum for 10 min. Glycine was added to a final concentration of  
481 0.125 M, and the sample was vacuum treated for an additional 5 min. After three  
482 washes with distilled water, samples were frozen in liquid nitrogen. ChIP experiments  
483 were performed as described using anti-GFP agarose beads (GFP track, gta-20) for  
484 immunoprecipitation [53]. The resulting DNA samples were purified with the QIA  
485 quick PCR purification kit (Qiagen, 28106). DNA fragments were analyzed by  
486 quantitative PCR, with the *Arabidopsis ACTIN2* (At3g18780) promoter as a reference.  
487 Enrichments were referred to the *35S:YFP-AtPIF3* against wild-type Col-0 seedlings.  
488 Primers of ChIP assays are listed in Table S1. The experiments were repeated with  
489 four independent biological samples, each from independent plants.

#### 490 **Luciferase activity assay**

491 *AtTPS10* Promoter: *luciferase* was used as a reporter construct. *35S:YFP*, *35S:AtPIF1*,  
492 *35S:AtPIF3*, *35S:AtPIF4*, *35S:AtPIF5*, *35S:AtMYC2* and *35S:βCI* were used as  
493 effector constructs. Nb leaves were agro-infiltrated with the constructs indicated in

494 each figures. Two days after infiltration, leaves were harvested and the luciferase  
495 (LUC) activity of infiltrated leaf cells was quantified by microplate reader as  
496 described [22]. Each treatment was repeated eight times in one experiment.

#### 497 **Protein extraction and western blot**

498 For  $\beta$ C1 stability assays, construct containing *35S:myc- $\beta$ C1* was infiltrated with *A.*  
499 *tumefaciens* strains (EHA105) and transiently expressed in leaves of four-week-old *N.*  
500 *benthamiana*. Plant samples were placed under different light conditions as indicated  
501 as in Figure 2. Total proteins were extracted from infiltrated leaf patches in 1 ml  
502 2×NuPAGE LDS sample buffer (Invitrogen, NP0008) containing 0.05mL/mL  
503  $\beta$ -mercaptoethanol, and protease inhibitor cocktail. Ten milligram protein extracts  
504 were taken for immunoblotting with anti-myc antibody (TransGen Biotech,  
505 HT101-01).

#### 506 **Data analysis**

507 Differences in whitefly performance, gene expression levels and average numbers of  
508 EYFP fluorescence were determined using Student's *t*-tests for comparing two  
509 treatments or two lines. Differences in relative enrichment fold of DNA fragments in  
510 the promoter and relative LUC activity were determined using One-way ANOVA,  
511 followed by Duncan's multiple range test for significant differences among different  
512 lines or different treatments. Differences in whitefly two-choice between different  
513 lines were analyzed by Wilcoxon matched pairs tests (with two dependent samples).  
514 All tests were carried out with GraphPad Prism.

#### 515 **Accession numbers**

516 Sequence data from this work can be found in Genebank/EMBL or The *Arabidopsis*  
517 Information Resource ([www.Arabidopsis.org](http://www.Arabidopsis.org)) under the following accession numbers:  
518 AtPIF1 (AT2G20180), AtPIF3 (AT1G09530), AtPIF4 (AT2G43010), AtPIF5  
519 (AT3G59060), AtMYC2 (At1G32640), AtTPS10 (At2G24210), AtTPS14  
520 (AT1G61680), AtTPS21 (AT5G23960), TYLCCNV  $\beta$ C1 (AJ421621).

## 521 **Acknowledgments**

522 We thank Prof. Peter Quail for providing *pifq* mutant (University of California,  
523 Berkeley) and Dr. Jang In-Cheol (Temasek Life Sciences Laboratory, Singapore) for  
524 useful discussion.

## 525 **Author contributions**

526 **Conceptualization:** Rongxiang Fang, Jian Ye.

527 **Data curation:** Pingzhi Zhao, Xuan Zhang, Yuqing Gong.

528 **Funding acquisition:** Jian Ye.

529 **Investigation:** Pingzhi Zhao, Xuan Zhang, Yuqing Gong.

530 **Methodology:** Pingzhi Zhao, Xuan Zhang, Yuqing Gong, Ning Wang.

531 **Project administration:** Jian Ye.

532 **Resources:** Dongqing Xu, Yanwei Sun.

533 **Supervision:** Jian Ye.

534 **Writing-original draft:** Pingzhi Zhao, Xuan Zhang, Yuqing Gong, Jian Ye.

535 **Writing-contributions:** Shu-Sheng Liu, Xing-Wang Deng, Daniel J. Kliebenstein,  
536 XuePing Zhou.

537 **Writing-review & editing:** Jian Ye.



## 538 References

- 539 1. Deutsch CA, Tewksbury JJ, Tigchelaar M, Battisti DS, Merrill SC, Huey RB, and Naylor RL.  
540 Increase in crop losses to insect pests in a warming climate. *Science* 2018; 361(6405):  
541 916-919. <https://doi.org/10.1126/science.aat3466>. PMID: 30166490.
- 542 2. Watts N, Amann M, Arnell N, Ayeb-Karlsson S, Belesova K, Boykoff M, Byass P, Cai W,  
543 Campbell-Lendrum, D, Capstick, S., et al. The 2019 report of The Lancet Countdown on  
544 health and climate change: ensuring that the health of a child born today is not defined by a  
545 changing climate. *Lancet*. 2019; 394(10211):1836-1878. [https://doi.org/](https://doi.org/10.1016/S0140-6736(19)32596-6)  
546 [10.1016/S0140-6736\(19\)32596-6](https://doi.org/10.1016/S0140-6736(19)32596-6). PMID: 31733927.
- 547 3. Shah AA, Dillon ME, Hotaling S, and Woods HA. High elevation insect communities face  
548 shifting ecological and evolutionary landscapes. *Curr Opin Insect Sci*. 2020; 41:1-6.  
549 [https://doi.org/ 10.1016/j.cois.2020.04.002](https://doi.org/10.1016/j.cois.2020.04.002). PMID: 32553896.
- 550 4. Navas-Castillo J, Fiallo-Olivé E, and Sánchez-Campos S. Emerging virus diseases transmitted  
551 by whiteflies. *Annu Rev Phytopathol*. 2011; 49: 219-248.  
552 <https://doi.org/10.1146/annurev-phyto-072910-095235>. PMID: 21568700.
- 553 5. Ronald R, and Beard CB. Vector-borne infections. *Emerg Infect Dis*. 2011; 17(5):769-770.  
554 <https://doi.org/10.3201/eid1705.110310>. PMID: 21529382.
- 555 6. Schuman MC, and Baldwin IT. Field studies reveal functions of chemical mediators in plant  
556 interactions. *Chem Soc Rev*. 2018; 47(14):5338-5353. <https://doi.org/10.1039/c7cs00749c>.  
557 PMID: 29770376.
- 558 7. Turlings TCJ, and Erb M. Tritrophic Interactions mediated by herbivore-induced plant  
559 volatiles: mechanisms, ecological relevance, and application potential. *Annu Rev Entomol*  
560 2018; 63:433-452. <https://doi.org/10.1146/annurev-ento-020117-043507>. PMID: 29324043.
- 561 8. Ghanim M. (2014). A review of the mechanisms and components that determine the  
562 transmission efficiency of Tomato yellow leaf curl virus (Geminiviridae; Begomovirus) by its  
563 whitefly vector. *Virus Res*. 2014; 186:47-54. <https://doi.org/10.1016/j.virusres>. PMID:  
564 24508344.
- 565 9. Eigenbrode SD, Bosque-Pérez NA, and Davis TS. Insect-borne plant pathogens and their  
566 vectors: ecology, evolution, and complex interactions. *Annu Rev Entomol*. 2018; 63:169-191.  
567 <https://doi.org/10.1146/annurev-ento-020117-043119> . PMID: 28968147.
- 568 10. Zhao P, Yao X, Cai C, Li R, Du J, Sun Y , Wang M , Zou Z, Wang Q , Kliebenstein, D.J., et al.  
569 Viruses mobilize plant immunity to deter nonvector insect herbivores. *Sci Adv*. 2019;  
570 5(8):eaav9801. <https://doi.org/10.1126/sciadv.aav9801> . PMID: 31457079.
- 571 11. Scheres, B., and van der Putten, W.H. The plant perceptron connects environment to  
572 development. *Nature*, 2017;543(7645), 337-345. [https://doi.org /10.1038/nature22010](https://doi.org/10.1038/nature22010). PMID:  
573 28300110.
- 574 12. Stam, J.M., Kroes, A., Li, Y., Gols, R., van Loon, J.J.A., Poelman, E.H., and Dicke, M. Plant  
575 interactions with multiple insect herbivores: from community to genes. *Annu Rev Plant Biol*.  
576 2014; 65, 689-713. <https://doi.org/10.1146/annurev-arplant-050213-035937>. PMID:  
577 24313843
- 578 13. Schuman, M.C., and Baldwin, I.T. The layers of plant responses to insect herbivores. *Annu*  
579 *Rev Entomol*. 2016; 61, 373-394. <https://doi.org/10.1146/annurev-ento-010715-023851>.  
580 PMID: 26651543

- 581 14. Ballaré, C.L. Light regulation of plant defense. *Annu Rev Plant Biol.* 2014; 65, 335-363.  
582 <https://doi.org/10.1146/annurev-arplant-050213-040145>. PMID: 24471835  
583
- 584 15. Douma, J.C., de Vries, J., Poelman, E.H., Dicke, M., Anten, N.P.R., and Evers, J.B. Ecological  
585 significance of light quality in optimizing plant defence. *Plant Cell Environ.* 2019;42(3),  
586 1065-1077. <https://doi.org/10.1111/pce.13524>. PMID: 30702750
- 587 16. Pham, V.N., Kathare, P.K., and Huq, E. Phytochromes and phytochrome interacting factors.  
588 *Plant Physiol.* 2018; 176 (2): 1025. <https://doi.org/doi.org/10.1104/pp.17.01384>. PMID:  
589 29138351
- 590 17. Ni, M., Tepperman, J.M., and Quail, P.H. PIF3, a phytochrome-interacting factor necessary for  
591 normal photoinduced signal transduction, is a novel basic helix-loop-helix protein. *Cell*, 1998  
592 2998; 95(5): 657-667. [https://doi.org/10.1016/s0092-8674\(00\)81636-0](https://doi.org/10.1016/s0092-8674(00)81636-0). PMID: 9845368
- 593 18. Toledo-Ortiz, G., Huq, E., and Quail, P.H. The Arabidopsis basic/helix-loop-helix transcription  
594 factor family. *The Plant Cell*, 2003; 15(8): 1749-1770. <https://doi.org/10.1105/tpc.013839>.  
595 PMID: 12897250
- 596 19. Leivar, P., and Quail, P.H. PIFs: pivotal components in a cellular signaling hub. *Trends Plant*  
597 *Sci.* 2011; 16(1):19-28. <https://doi.org/10.1016/j.tplants.2010.08.003>. PMID: 20833098
- 598 20. Dicke, M., and Baldwin, I.T. The evolutionary context for herbivore-induced plant volatiles:  
599 beyond the 'cry for help'. *Trends Plant Sci.* 2010; 15(3):167-175.  
600 <https://doi.org/10.1016/j.tplants.2009.12.002>. PMID: 20047849
- 601 21. Hong, G.J., Xue, X.Y., Mao, Y.B., Wang, L.J., and Chen, X.Y. Arabidopsis MYC2 interacts  
602 with DELLA proteins in regulating sesquiterpene synthase gene expression. *The Plant Cell*,  
603 2012; 24(6): 2635-2648. <https://doi.org/10.1105/tpc.112.098749>. PMID: 22669881
- 604 22. Li, R., Weldegergis, B.T., Li, J., Jung, C., Qu, J., Sun, Y., Qian, H., Tee, C., van Loon, J.J., and  
605 Dicke, M. Virulence factors of geminivirus interact with MYC2 to subvert plant resistance and  
606 promote vector performance. *The Plant Cell*, 2014; 26(12): 4991-5008. [https://doi.org/](https://doi.org/10.1105/tpc.114.133181)  
607 [10.1105/tpc.114.133181](https://doi.org/10.1105/tpc.114.133181). PMID: 25490915
- 608 23. Wu, X., Xu, S., Zhao, P., Zhang, X., Yao, X., Sun, Y., Fang, R., and Ye, J. The Orthotospovirus  
609 nonstructural protein NSs suppresses plant MYC-regulated jasmonate signaling leading to  
610 enhanced vector attraction and performance. *PLoS Pathog.* 2019; 15(6): e1007897.  
611 <https://doi.org/10.1371/journal.ppat.1007897>. PMID: 31206553
- 612 24. Wu, X., and Ye, J. Manipulation of jasmonate signaling by plant viruses and their insect  
613 vectors. *Viruses*, 2020; 12(2):148. <https://doi.org/10.3390/v12020148>. PMID: 32012772
- 614 25. Kegge, W., Weldegergis, B.T., Soler, R., Eijk, M.V.-V., Dicke, M., Voeselek, L.A.C.J., and  
615 Pierik, R. (2013). Canopy light cues affect emission of constitutive and methyl  
616 jasmonate-induced volatile organic compounds in Arabidopsis thaliana. *New Phytol.* 2013;  
617 200(3):861-874. <https://doi.org/10.1111/nph.12407>. PMID: 23845065
- 618 26. Luan, J.B., Yao, D.M., Zhang, T., Walling, L.L., Yang, M., Wang, Y.J., and Liu, S.S.  
619 Suppression of terpenoid synthesis in plants by a virus promotes its mutualism with vectors.  
620 *Ecol Lett.* 2013; 16(3):390-398. <https://doi.org/10.1111/ele.12055>. PMID: 23279824
- 621 27. Zhou, X. Advances in understanding begomovirus satellites. *Annu Rev Phytopathol.* 2013; 51:  
622 357-381. <https://doi.org/10.1146/annurev-phyto-082712-102234>. PMID: 23915133

- 623 28. Li, F., Yang, X., Bisaro, D.M., and Zhou, X. The  $\beta$ C1 Protein of geminivirus–betasatellite  
624 complexes: a target and repressor of host defenses. *Mol Plant*, 2018;11(12):1424-1426.  
625 <https://doi.org/10.1016/j.molp.2018.10.007>, PMID: 30404041
- 626 9. Yang, X., Guo, W., Li, F., Sunter, G., and Zhou, X. Geminivirus-associated betasatellites:  
627 exploiting chinks in the antiviral arsenal of plants. *Trends Plant Sci.* 2019;24(6): 519-529.  
628 <https://doi.org/10.1016/j.tplants.2019.03.010>, PMID: 31003895
- 629 30. Bleeker, P.M., Diergaarde, P.J., Ament, K., Guerra, J., Weidner, M., Schutz, S., de Both, M.T.,  
630 Haring, M.A., and Schuurink, R.C. The role of specific tomato volatiles in tomato-whitefly  
631 interaction. *Plant Physiol.* 2009; 151(2): 925-935. <https://doi.org/10.1104/pp.109.142661>,  
632 PMID: 19692533
- 633 31. Shibuya, T., Komuro, J., Hirai, N., Sakamoto, Y., Endo, R., and Kitaya, Y. (2010). Preference  
634 of sweetpotato whitefly adults to cucumber seedlings grown under two different light sources.  
635 *Horttechnol.* 2010; 20(5):873-876. <https://doi.org/10.21273/HORTTECH.20.5.873>.
- 636 32. Briscoe, A.D., and Chittka, L. The evolution of color vision in insects. *Annu Rev Entomol.*  
637 2001; 46: 471. <https://doi.org/10.1146/annurev.ento.46.1.471>. PMID: 11112177
- 638 33. Liu, S.S., De Barro, P.J., Xu, J., Luan, J.B., Zang, L.S., Ruan, Y.M., and Wan, F.H.  
639 Asymmetric mating interactions drive widespread invasion and displacement in a whitefly.  
640 *Science*, 2007; 318 (5857):1769-1772. <https://doi.org/10.1126/science.1149887>. PMID:  
641 17991828
- 642 34. Paik, I., Kathare, P.K., Kim, J.I., and Huq, E. Expanding roles of PIFs in signal integration  
643 from multiple processes. *Molecular Plant* 2017;10(8): 1035-1046.  
644 <https://doi.org/10.1016/j.molp.2017.07.002>. PMID: 28711729
- 645 35. Martínez-García, J.F., Huq, E., and Quail, P.H. Direct targeting of light signals to a promoter  
646 element-bound transcription factor. *Science*, 2000; 288(5467):859-863.  
647 <https://doi.org/10.1126/science.288.5467.859>. PMID: 10797009
- 648 36. Zhang, Y., Mayba, O., Pfeiffer, A., Shi, H., Tepperman, J.M., Speed, T.P., and Quail, P.H. A  
649 quartet of PIF bHLH factors provides a transcriptionally centered signaling hub that regulates  
650 seedling morphogenesis through differential expression-patterning of shared target genes in  
651 *Arabidopsis*. *PLoS Genet.* 2013; 9(1), e1003244.  
652 <https://doi.org/10.1371/journal.pgen.1003244>. PMID: 23382695
- 653 37. Zhang, X., Ji, Y., Xue, C., Ma, H., Xi, Y., Huang, P., Wang, H., An, F., Li, B., Wang, Y., et al.  
654 Integrated regulation of apical hook development by transcriptional coupling of EIN3/EIL1  
655 and PIFs in *Arabidopsis*. *The Plant Cell*, 2018;30(9):1971-1988.  
656 <https://doi.org/10.1105/tpc.18.00018>. PMID: 30104405
- 657 38. Velásquez, A.C., Castroverde, C.D.M., and He, S.Y. Plant–pathogen warfare under changing  
658 climate conditions. *Cur Biol.* 2018;28(10):R619-R634.  
659 <https://doi.org/10.1016/j.cub.2018.03.054>. PMID: 29787730
- 660 39. Carr, J.P., Murphy, A.M., Tungadi, T., and Yoon, J.-Y. Plant defense signals: Players and  
661 pawns in plant-virus-vector interactions. *Plant Sci.* 2019; 279:87-95.  
662 <https://doi.org/10.1016/j.plantsci.2018.04.011>. PMID: 30709497
- 663 40. Fereres, A., Peñaflo, M.F., Favaro, C.F., Azevedo, K.E., Landi, C.H., Maluta, N.K., Bento,  
664 J.M., and Lopes, J.R. Tomato infection by whitefly-transmitted circulative and non-circulative  
665 viruses induce contrasting changes in plant volatiles and vector behaviour. *Viruses.* 2016;  
666 8(8):225. <https://doi.org/10.3390/v8080225>. PMID: 27529271

- 667 41. Mann, R.S., Ali, J.G., Hermann, S.L., Tiwari, S., Pelz-Stelinski, K.S., Alborn, H.T., and  
668 Stelinski, L.L. Induced release of a plant-defense volatile ‘Deceptively’ attracts insect vectors  
669 to plants infected with a bacterial pathogen. *PLoS Pathog.* 2012; 8(3): e1002610.  
670 <https://doi.org/10.1371/journal.ppat.1002610>. PMID: 22457628
- 671 42. Chico, J.M., Fernández-Barbero, G., Chini, A., Fernández-Calvo, P., Díez-Díaz, M., and  
672 Solano, R. Repression of jasmonate-dependent defenses by shade involves differential  
673 regulation of protein stability of MYC transcription factors and their JAZ repressors in  
674 *Arabidopsis*. *The Plant Cell*, 2014; 26(3):1967-1980. <https://doi.org/10.1105/tpc.114.125047>.  
675 PMID: 24824488
- 676 43. Castillon, A., Shen, H., and Huq, E. Phytochrome Interacting Factors: central players in  
677 phytochrome-mediated light signaling networks. *Trends Plant Sci.* 2007; 12(11):514-521.  
678 <https://doi.org/10.1016/j.tplants.2007.10.001>. PMID: 17933576
- 679 44. Lee, N., and Choi, G. Phytochrome-interacting factor from *Arabidopsis* to liverwort. *Curr*  
680 *Opin Plant Biol.* 2017; 35: 54-60. <https://doi.org/10.1016/j.pbi.2016.11.004>. PMID:  
681 27875778
- 682 45. Franklin, K.A., and Quail, P.H. Phytochrome functions in *Arabidopsis* development. *J Exp Bot.*  
683 2009; 61(1): 11-24. <https://doi.org/10.1093/jxb/erp304>. PMID: 19815685
- 684 46. Li, J., Li, G., Wang, H., and Wang Deng, X. Phytochrome signaling mechanisms. *Arabidopsis*  
685 *Book*. 2011(9): e0148. <https://doi.org/10.1199/tab.0148>. PMID: 22303272
- 686 47. Haxim, Y., Ismayil, A., Jia, Q., Wang, Y., Zheng, X., Chen, T., Qian, L., Liu, N., Wang, Y., Han,  
687 S., et al. Autophagy functions as an antiviral mechanism against geminiviruses in plants. *eLife*.  
688 2017; 6: e23897. <https://doi.org/10.7554/eLife.23897>. PMID: 28244873
- 689 48. Yang, J.Y., Iwasaki, M., Machida, C., Machida, Y., Zhou, X., and Chua, N.H.βC1, the  
690 pathogenicity factor of TYLCCNV, interacts with AS1 to alter leaf development and suppress  
691 selective jasmonic acid responses. *Genes Dev.* 2008; 22(18): 2564-2577.  
692 <https://doi.org/10.1101/gad.1682208>. PMID: 18794352
- 693 49. Leivar, P., Tepperman, J.M., Monte, E., Calderon, R.H., Liu, T.L., and Quail, P.H. Definition  
694 of early transcriptional circuitry involved in light-induced reversal of PIF-imposed repression  
695 of photomorphogenesis in young *Arabidopsis* seedlings. *The Plant Cell*, 2009;  
696 21(11):3535-3553. <https://doi.org/10.1105/tpc.109.070672>. PMID: 19920208
- 697 50. Lorenzo, O., Chico, J.M., Sánchez-Serrano, J.J., and Solano, R.  
698 JASMONATE-INSENSITIVE1 encodes a MYC transcription factor essential to discriminate  
699 between different jasmonate-regulated defense responses in *Arabidopsis*. *The Plant Cell*, 2004;  
700 16(7):1938-1950. <https://doi.org/10.1105/tpc.022319>. PMID: 15208388
- 701 51. Cui, X., Tao, X., Xie, Y., Fauquet, C.M., and Zhou, X. A DNAbeta associated with Tomato  
702 yellow leaf curl China virus is required for symptom induction. *J Virol.* 2004; 78(24):  
703 13966-13974. <https://doi.org/10.1128/JVI.78.24.13966-13974.2004>. PMID: 15564504
- 704 52. Quail, P.H. Phytochrome photosensory signalling networks. *Nat Rev Mol Cell Biol.* 2002;  
705 3(2): 85-93. <https://doi.org/10.1038/nrm728>. PMID: 11836510
- 706 53. Ye, J., Yang, J., Sun, Y., Zhao, P., Gao, S., Jung, C., Qu, J., Fang, R., and Chua, N.H.  
707 Geminivirus activates ASYMMETRIC LEAVES 2 to accelerate cytoplasmic DCP2-mediated  
708 mRNA turnover and weakens RNA silencing in *Arabidopsis*. *PLoS Pathog.* 2015;  
709 11(10):e1005196 <https://doi.org/10.1371/journal.ppat.1005196>. PMID: 26431425

710

## 711 **Figure legends**

712 **Fig 1. Begomoviral  $\beta$ C1-mediated whitefly preference is light-dependent. (A)** The  
713 schematic diagram of whitefly preference for plant leaf of different ages. Control  
714 plants (TA+m $\beta$ ) or virus-infected plants (TA+ $\beta$ ) were exposed to white light (left  
715 panel) or dark condition for 12 h at 25°C (right panel) before whitefly preference  
716 experiment. Light intensity was measured using a spectrometer. **(B)** Whitefly  
717 preference (as percentage recaptured whiteflies out of 200 released) on uninfected *N.*  
718 *benthamiana* (Nb, mock) and plants infected by TA+ $\beta$ , or on plants infected by TA+ $\beta$   
719 and a mutant  $\beta$ C1 (TA+m $\beta$ ) in the white light or under darkness. Values are mean +  
720 SD (n=6). **(C-D)** Whitefly preference on wild-type Nb and  $\beta$ C1 transgenic Nb plants  
721 ( $\beta$ C1-1/Nb) (C) or wild-type Col-0 and  $\beta$ C1 transgenic *Arabidopsis* plants ( $\beta$ C1-3/At)  
722 (D) in response to white, dark, red, far-red, and blue light. Plants were placed under  
723 darkness for 24 h, followed by a 2 h light exposure and then performed whitefly  
724 choice experiments. Red→Far-red indicates that plants were firstly kept in darkness  
725 for 24 h, followed by a 2 h red light exposure, and then transferred to far-red light for  
726 2 h. Values are mean + SD (n=6). In B-D, asterisks indicate significant differences  
727 between different treatments or lines (\*\*, P< 0.01; ns, no significant differences; the  
728 Wilcoxon matched pairs test). **(E)** Relative expression levels of *AtTPS10* in Col-0 and  
729 two  $\beta$ C1/At plants ( $\beta$ C1-1/At and  $\beta$ C1-3/At) under different light conditions. Values  
730 are mean  $\pm$  SD (n=3) (\*, P< 0.05; \*\*, P< 0.01; Student's *t*-test). The light was  
731 supplied by LED light sources, with irradiance fluency rates of: white (80  $\mu$ mol m<sup>-2</sup>  
732 sec<sup>-1</sup>), blue (15  $\mu$ mol m<sup>-2</sup> sec<sup>-1</sup>), red (20  $\mu$ mol m<sup>-2</sup> sec<sup>-1</sup>), and far-red (2  $\mu$ mol m<sup>-2</sup>

733  $\text{sec}^{-1}$ ).

734 **Fig 2. Light-dependent stability of  $\beta\text{C1}$  protein.** (A) Accumulation of  $\beta\text{C1}$  proteins  
735 in Nb plants after different light treatments for 2h. Plants were agroinfiltrated with  
736 *35S:myc- $\beta\text{C1}$* , incubated in the dark for 60 h, and followed by a 2 h light exposure.  
737 Samples were detected by immunoblot analysis using anti-myc antibody. Stained  
738 membrane bands of the large subunit of Rubisco (*rbcL*) were used as a loading control.  
739 **(B-D)** Degradation of  $\beta\text{C1}$  proteins in response to darkness, red light and far-red light.  
740 Nb plants were infiltrated with *A. tumefaciens* cells harboring *35S:myc- $\beta\text{C1}$* , and  
741 incubated in a growth chamber at 25°C with a 12 h light/ 12 h darkness cycle for 60 h.  
742 Samples were injected with 100  $\mu\text{M}$  cycloheximide (CHX) and then transferred to  
743 darkness (B), exposed to continuous red light (20  $\mu\text{mol m}^{-2} \text{sec}^{-1}$ ) (C), or far-red light  
744 (2  $\mu\text{mol m}^{-2} \text{sec}^{-1}$ ) (D), respectively. Samples were collected at the designated times  
745 intervals and detected by anti-myc antibody.  $\beta\text{C1}$  protein was quantitated by band  
746 intensities in immunoblots using ImageJ software and normalized to individual *rbcL*  
747 level.  $T^{1/2}$  indicates half-life of  $\beta\text{C1}$  protein under darkness or various light conditions.  
748 Accumulated  $\beta\text{C1}$  protein level at time 0 was set as one.

749 **Fig 3.  $\beta\text{C1}$  interacts with phytochrome-interacting factors (PIFs).** (A) Interaction  
750 between  $\beta\text{C1}$  and *Arabidopsis* PIFs (*AtPIF1*, *AtPIF3*, *AtPIF4* or *AtPIF5*) in the yeast  
751 two-hybrid system. The empty vectors pGAD424 and pGBT9 were used as negative  
752 controls. **(B)** *In vivo* BiFC analysis of  $\beta\text{C1}$  interaction with *Arabidopsis* PIFs (*AtPIF1*,  
753 *AtPIF3*, *AtPIF4* or *AtPIF5*). Fluorescence was observed owing to complementation of  
754 the  $\beta\text{C1}$ -cEYFP fused protein and nEYFP-*AtPIFs* fused protein. Nuclei of Nb leaf



755 epidermal cells were stained with DAPI. Unfused nEYFP was used as a negative  
756 control. Scale bars = 50  $\mu$ m. **(C)** Co-IP analysis of AtPIF3-HA and YFP- $\beta$ C1  
757 interaction *in vivo*. YFP was used as a negative control, while AtMYC2-HA was used  
758 as a positive control. All of above interaction experiments were performed in normal  
759 light condition.

760 **Fig 4. *Arabidopsis* PIFs confer tolerance to whitefly vector.** **(A)** Number of eggs  
761 laid per female whitefly per day on Col-0 and *AtPIF3*-overexpressing (*AtPIF3*-OE)  
762 transgenic plants. **(B)** Pupa numbers of whiteflies on Col-0 and *AtPIF3*-OE transgenic  
763 plants. **(C)** Number of eggs laid per female whitefly per day on Col-0, *pifq* or  
764  $\beta$ C1-3/At plants. **(D)** Pupa numbers of whiteflies on Col-0, *pifq* or  $\beta$ C1-3/At plants. In  
765 figure A-D, values are mean  $\pm$  SD (n=8). Asterisks indicate significant differences of  
766 whitefly performance between Col-0 and mutant plants (\*, P< 0.05; \*\*, P< 0.01;  
767 Student's *t*-test). **(E)** Whitefly preference on Col-0 and *pifq* mutant plants in response  
768 to white, dark, red, far-red, and blue light. The plants were placed in darkness for 24 h  
769 prior to the 2 h different light treatments. Values are mean + SD (n=6) (\*\*, P< 0.01;  
770 ns, no significant differences; the Wilcoxon matched pairs test). **(F-H)** Relative  
771 expression levels of *AtTPS10* (F), *AtTPS14* (G), and *AtTPS21* (H) in Col-0 and *pifq*  
772 mutant plants after a 2 h treatment of different lights. Values are mean  $\pm$  SD (n=3) (\*\*,  
773 P< 0.01; Student's *t*-test).

774 **Fig 5.  $\beta$ C1 suppresses transcriptional activity of PIFs by inhibiting its**  
775 **dimerization.** **(A)** Schematic diagram of *AtTPS10* promoter. The black triangles  
776 represent G-box like motifs. A fragment of the three lines (I, II and III), as indicated

777 by the triangles was amplified in ChIP assay. The end positions of each fragment (kb)  
778 relative to the transcription start site are indicated below. UTR, untranslated region. **(B)**  
779 Fold enrichment of YFP-AtPIF3 associated with each of the three DNA fragments (I,  
780 II and III) of *AtTPS10* promoter in ChIP assay. Values are mean  $\pm$  SD (n=4). The  
781 same letters above the bars indicate lack of significant difference at the 0.05 level by  
782 Duncan's multiple range test. **(C)** Modified BiFC competition assays. The EYFP  
783 fluorescence was detected after co-expression of GUS + AtPIF3-cEYFP +  
784 nEYFP-AtPIF3 (GUS),  $\beta$ C1 + AtPIF3-cEYFP + nEYFP-AtPIF3 ( $\beta$ C1), or GUS +  
785 AtPIF3-cEYFP + nEYFP-AtPIF4,  $\beta$ C1 + AtPIF3-cEYFP + nEYFP-AtPIF4. Scale  
786 bars = 50  $\mu$ m. **(D-E)** Average numbers of EYFP fluorescence show effects of  $\beta$ C1 on  
787 the formation of AtPIF3-AtPIF3 homodimers (D) and AtPIF3-AtPIF4 heterodimers  
788 (E). Values are mean  $\pm$  SD (n=8) (\*\*, P< 0.01; Student's *t*-test). **(F-G)** GST  
789 pull-down protein competition assays. The indicated protein amount of His- $\beta$ C1 or  
790 GST was mixed with 2  $\mu$ g of GST-AtPIF4 and pulled down by 2  $\mu$ g of MBP-AtPIF4  
791 (F) or 2  $\mu$ g of MBP-AtPIF3 (G). Immunoblots were performed using anti-GST  
792 antibody to detect the associated proteins. Membranes were stained with Coomassie  
793 brilliant blue to monitor input protein amount. **(H)** Effects of  $\beta$ C1 on transcriptional  
794 activity of each AtPIFs (AtPIF1, AtPIF3, AtPIF4, or AtPIF5) on *AtTPS10* promoter  
795 under white light. *AtTPS10* promoter: *luciferase (LUC)* was used as a reporter  
796 construct. YFP, YFP-AtPIFs, and YFP- $\beta$ C1 were used as effector constructs. Values  
797 are mean  $\pm$  SD (n=8) (\*, P< 0.05; \*\*, P< 0.01; Student's *t*-test).

798 **Fig 6. *Arabidopsis* PIFs and MYC2 transcription factors synergistically regulate**



799 ***AtTPS10* transcription. (A)** Relative expression levels of *AtTPS10* in Col-0, *pifq*,  
800 *myc2-1* and *pifq/myc2-1* mutant plants after a 2 h treatment with different light.  
801 Values are mean  $\pm$  SD (n=3). **(B)** Effects of  $\beta$ C1 on trans-activation activity of  
802 AtPIF4 or AtMYC2 on *AtTPS10* promoter under white light. *AtTPS10* Promoter: *LUC*  
803 was used as a reporter construct. YFP, AtPIF4, AtMYC2 and  $\beta$ C1 were used as  
804 effector constructs. Values are mean  $\pm$  SD (n=8). In A and B, the same letters above  
805 the bar indicate lack of significant differences at the 0.05 level in Duncan's multiple  
806 range test. **(C)** Modified BiFC competition assays. The EYFP fluorescences were  
807 detected using co-expression of AtPIF4-cEYFP + nEYFP-AtMYC2 with or without  
808  $\beta$ C1 under normal light. Scale bars = 50  $\mu$ m. **(D)** Effects of  $\beta$ C1 on the interaction  
809 between AtPIF4 and AtMYC2. Values are mean  $\pm$  SD (n=8) (\*\*, P< 0.01; Student's  
810 *t*-test). **(E)** Protein competition pull-down assay. The indicated protein amount of  
811 His- $\beta$ C1 or GST was mixed with 2  $\mu$ g of GST-AtMYC2 and pulled down by 2  $\mu$ g of  
812 MBP-AtPIF4. The associated proteins were detected by immunoblots using anti-GST  
813 antibody.

814 **Fig 7. Light and JA signals synergistically regulate whitefly host preference. (A-B)**

815 Whitefly preference on Col-0 and  $\beta$ C1-3/At plants (A) or Col-0 and *pifq* mutant plants  
816 (B) with or without MeJA treatment under darkness. Values are mean  $\pm$  SD (n=6) (\*\*,  
817 P< 0.01; ns, no significant differences; the Wilcoxon matched pairs test). **(C-E)**  
818 Relative expression levels of *AtTPS10* (C), *AtTPS14* (D), and *AtTPS21* (E) in Col-0  
819 and two  $\beta$ C1 transgenic *Arabidopsis* lines with or without MeJA treatment under  
820 darkness. Values are mean  $\pm$  SD (n=3) (\*\*, P< 0.01; Student's *t*-test). **(F-H)** Relative

821 expression levels of *AtTPS10* (F), *AtTPS14* (G), and *AtTPS21* (H) in Col-0 and *pifq*  
822 mutant with or without MeJA treatment under darkness. Values are mean  $\pm$  SD (n=3)  
823 (\*,  $P < 0.05$ ; \*\*,  $P < 0.01$ ; Student's *t*-test).

824

825

## 826 **Supporting information**

### 827 **S1 Fig. Begomovirus encodes $\beta$ C1 to modulate light-regulated plant defense. (A)**

828 Whitefly preference on wild-type Nb and  $\beta$ C1 transgenic Nb plants ( $\beta$ C1-2/Nb) in  
829 response to white, dark, red, far-red, and blue light. Plants were placed under darkness  
830 for 24 h, followed by a 2 h light exposure and then performed whitefly choice  
831 experiments. Red $\rightarrow$ Far-red indicates that plants were firstly kept in darkness for 24 h,  
832 followed by a 2 h red light exposure, and then transferred to far-red light for 2 h.  
833 Values are mean + SD (n=6). Asterisks indicate significant differences between  
834 different treatments or lines (\*\*,  $P < 0.01$ ; ns, no significant differences; the Wilcoxon  
835 matched pairs test). **(B-C)** Relative expression levels of *AtTPS14* (B), and *AtTPS21* (C)  
836 in Col-0 and two  $\beta$ C1/At plants ( $\beta$ C1-1/At and  $\beta$ C1-3/At) under different light  
837 conditions. Values are mean  $\pm$  SD (n=3) (\*,  $P < 0.05$ ; \*\*,  $P < 0.01$ ; Student's *t*-test).  
838 The light was supplied by LED light sources, with irradiance fluency rates of: white  
839 ( $80 \mu\text{mol m}^{-2} \text{sec}^{-1}$ ), blue ( $15 \mu\text{mol m}^{-2} \text{sec}^{-1}$ ), red ( $20 \mu\text{mol m}^{-2} \text{sec}^{-1}$ ), and far-red ( $2$   
840  $\mu\text{mol m}^{-2} \text{sec}^{-1}$ ).

### 841 **S2 Fig. Red light plays a crucial role for plant defense against whitefly. (A)**

842 Whitefly preference (as percentage recaptured whiteflies out of 200 released) on  
843 wild-type Col-0 in response to darkness or red light. The plants were placed in  
844 darkness for 24 h prior to the 2 h dark or 2 h red light ( $20 \mu\text{mol m}^{-2} \text{sec}^{-1}$ ) treatments.  
845 Values are mean + SD (n=6). Asterisks indicate significant differences of whitefly  
846 preference between treatments (\*\*,  $P < 0.01$ ; the Wilcoxon matched pairs test). **(B)**

847 Relative expression levels of *AtTPS10* in Col-0 plants exposed to darkness or red light.  
848 Values are mean  $\pm$  SD (n=3). Asterisks indicate significant differences of *AtTPS10*  
849 expression in Col-0 plants between under darkness and red light (\*\*,  $P < 0.01$ ;  
850 Student's *t*-test).

851 **S3 Fig. Light has no visible effect on the subcellular localization of  $\beta$ C1 protein**  
852 **or its transcript levels. (A)** Subcellular localization of YFP- $\beta$ C1 in *N. benthamiana*  
853 under darkness or white light condition. After transient inoculation of *35S:YFP- $\beta$ C1*,  
854 plants were placed in the dark or in the white light for 48 h prior to the observation.  
855 Scale bars = 50  $\mu$ m. **(B)** Relative expression levels of  $\beta$ C1 in Col-0 plants in response  
856 to dark or white light. Values are means  $\pm$  SD (n=3). 'ns' indicates no significant  
857 differences.

858 **S4 Fig. Red light promotes the stability of  $\beta$ C1 protein.** Accumulation of  $\beta$ C1  
859 proteins in two stable transgenic lines (*35S:myc- $\beta$ C1* #1 and #2). Plants were placed  
860 under darkness for 24 h, followed by a 2 h light exposure. Samples were detected by  
861 immunoblot analysis using anti-myc antibody. Stained membrane bands of the large  
862 subunit of Rubisco (*rbcL*) were used as a loading control.

863 **S5 Fig.  $\beta$ C1 interacts with bHLH domain of AtPIFs protein. (A)** Domain structure  
864 of AtPIFs proteins. Schematic diagrams of the AtPIFs polypeptide show the location  
865 of the consensus basic helix-loop-helix (bHLH) domain, which defines this  
866 transcription factor family, as well as the Active Phytochrome A-binding (APA)  
867 region and the Active Phytochrome B-binding (APB) region. **(B)** BiFC analysis of  
868 AtPIF3 derivative interaction with  $\beta$ C1 protein. The EYFP fluorescences were only  
869 observed owing to complementation of  $\beta$ C1-cEYFP with nEYFP-AtPIF3<sup>bHLH</sup> in  
870 normal light.  $\Delta$ bHLH indicates deletion of bHLH domain in AtPIF3. Scale bars = 50  
871  $\mu$ m.

872 **S6 Fig. AtPIF proteins interact with MYC2.** *In vivo* BiFC analysis of AtMYC2  
873 interaction with AtPIFs (AtPIF3 or AtPIF4) in normal light. Scale bars = 50  $\mu$ m.

874 **S7 Fig. Begomovirus infection triggers PIFs transcription in *Arabidopsis*.** Relative  
875 expression levels of *AtPIFs* in *Arabidopsis* plants. *Arabidopsis* Col-0 plants  
876 agroinfiltrated with the infectious clones of TA+ $\beta$  complex at 14 dpi, followed by

877 infestation by whiteflies for 6 h. Total plant RNAs were extracted for qRT-PCR  
878 analysis. Uninfected Col-0 plants were used as mock. Values are means  $\pm$  SD (n=3).  
879 Asterisks indicate significant differences of *AtPIF* genes expression between mock  
880 and infected-Col-0 plants (\*,  $P < 0.05$ ; \*\*,  $P < 0.01$ ; Student's *t*-test).

881 **S8 Fig. The expression of PIFs and MYCs is complemented and balanced**  
882 **regulation.** (A) The expression pattern of *Arabidopsis TPS10/TPS14/TPS21* is  
883 constant during night and day time. Relative expression levels of *AtTPS* genes in  
884 Col-0 under 12 h light/12 h darkness. Values are mean  $\pm$  SD (n=3). (B) Relative  
885 expression levels of *AtMYC* genes in Col-0 and *pifq* mutant plants under light. (C)  
886 Relative expression levels of *AtPIF* genes in Col-0 and *myc2-1* mutant plants under  
887 light. Values are mean  $\pm$  SD (n=3). In figure B-C, asterisks indicate significant  
888 differences of genes expression between Col-0 and mutant plants (\*,  $P < 0.05$ ; \*\*,  $P <$   
889 0.01; Student's *t*-test).

890 **S9 Fig.  $\beta$ C1 protein accumulation in continuous red light and far-red light.**  
891 Accumulation of  $\beta$ C1 proteins in Nb plants after treated with continuous red light and  
892 far-red light. Plants were placed under darkness for 60 h, then transferred to  
893 continuous red light and far-red light for 2 h respectively. Samples were detected by  
894 immunoblot analysis using anti-myc antibody. Stained membrane bands of the large  
895 subunit of Rubisco (rbcL) were used as a loading control.

896 **S10 Fig. A working model of red-light regulated begomovirus-whitefly mutualism.**  
897 (A) In uninfected plant, both plant PIFs and MYC2 mediate the transcription of *TPS*  
898 genes by respectively binding to different G-box-like elements of the promoter region,  
899 and activate *TPSs* transcription. Thus, red-light signal and JA signal fine-tune  
900 transcription of *TPS* genes in plants to defend against whitefly. (B) In  
901 begomovirus-infected plants,  $\beta$ C1 interacts with PIFs and MYC2, and inhibits their  
902 transcriptional activity by interfering with their homodimerization and promoting  
903 AtPIFs-AtMYC2 heterodimerization. Finally, the decreased terpene synthesis and in  
904 turn enhanced whitefly performance increase the probability of pathogen  
905 transmission.

906 **S1 Table. DNA primers used in this study.**

| Gene                       | Sequence(5'-3')                  | Purpose |
|----------------------------|----------------------------------|---------|
| βC1-F                      | GGCCGAATTCATGACTATCAAATACAAC     | BiFC    |
| βC1-R                      | CGCGGGATCCTCATACTGAATTTGT        | BiFC    |
| AtPIF1-F                   | CAAGGGTACCATGCATCATTTTGTCCCTGA   | BiFC    |
| AtPIF1-R                   | CAAGGCGGCCGCCCTGTTGTGTGGTTTCCGTG | BiFC    |
| AtPIF3-F                   | CAAGGGTACCATGCCTCTGTTTGAGCTTTT   | BiFC    |
| AtPIF3-R                   | CAAGCTCGAGGACGATCCACAAAAGTATC    | BiFC    |
| AtPIF4-F                   | CAAGGGTACCATGGAACACCAAGTTGGAG    | BiFC    |
| AtPIF4-R                   | CAAGCTCGAGTGGTCCAAACGAGAACCGTC   | BiFC    |
| AtPIF5-F                   | CAAGGGTACCATGGAACAAGTGTGCTGA     | BiFC    |
| AtPIF5-R                   | CAAGCTCGAGCCTATTTTACCCATATGAAG   | BiFC    |
| AtPIF3 <sup>APA</sup> -F   | CAAGGAATTCATGCCTCTGTTTGAGCTTTT   | BiFC    |
| AtPIF3 <sup>APA</sup> -R   | CAAGGGTACCGCAAGGGAGGGATGATGATTC  | BiFC    |
| AtPIF3 <sup>APB</sup> -F   | CAAGGAATTCCTCCCTTGTGGATATTG      | BiFC    |
| AtPIF3 <sup>APB</sup> -R   | CAAGGGTACCGTTTAGCTCCAAGAACTCTGG  | BiFC    |
| AtPIF3 <sup>bHLH</sup> -F  | CAAGGAATTCAAAGAAAAGAGTCCTCAAAGC  | BiFC    |
| AtPIF3 <sup>bHLH</sup> -R  | CAAGGGTACCGCGACGATCCACAAAAGTATC  | BiFC    |
| AtPIF3 <sup>ΔbHLH</sup> -F | CAAGGAATTCATGCCTCTGTTTGAGCTTTT   | BiFC    |
| AtPIF3 <sup>ΔbHLH</sup> -R | CAAGGGTACCGTTTAGCTCCAAGAACTCTGG  | BiFC    |
| Actin2-qF                  | AGTGGTCGTACAACCGGTATTGT          | RT-qPCR |
| Actin2-qR                  | GATGGCATGAGGAAGAGAGAAAC          | RT-qPCR |
| AtTPS10-qF                 | GTACATGCAAAATGCTCGGAT            | RT-qPCR |
| AtTPS10-qR                 | TTGGTGTGGGACAAAGTCTC             | RT-qPCR |
| AtTPS14-qF                 | AGGCGAAGAACTAACAAAAGAG           | RT-qPCR |
| AtTPS14-qR                 | AGAATGGACATGGATTCAGACA           | RT-qPCR |
| AtTPS21-qF                 | TCGCCTTGGTGTCTCCTATCAC           | RT-qPCR |
| AtTPS21-qR                 | CTTTGAACTTCCCATTTTCGTCC          | RT-qPCR |
| AtMYC2-qF                  | GTGCGGGATTAGCTGGTAAA             | RT-qPCR |
| AtMYC2-qR                  | ATGCATCCCAAACACTCCTC             | RT-qPCR |
| AtMYC3-qF                  | TGTTGAAGCAGAGAGGCAGA             | RT-qPCR |
| AtMYC3-qR                  | CTCCGAGAAGCGAAGCTTTA             | RT-qPCR |
| AtMYC4-qF                  | AGGAGCAAACGAGAACTGGA             | RT-qPCR |
| AtMYC4-qR                  | CCATCTCCCAACCTAACAA              | RT-qPCR |
| AtPIF1-qF                  | GTGAAGATGATGATCTTA               | RT-qPCR |
| AtPIF1-qR                  | GATCTTCTTCTCCGC                  | RT-qPCR |
| AtPIF3-qF                  | GGGAAAATGGTCAGATAT               | RT-qPCR |
| AtPIF3-qR                  | TGCTCTGATTTCTTGCCT               | RT-qPCR |
| AtPIF4-qF                  | ATGGACAAGTGGTTCTGC               | RT-qPCR |
| AtPIF4-qR                  | ACGGTTAAGCCTAAGTCC               | RT-qPCR |
| AtPIF5-qF                  | GGAGAGATGGTCAAG                  | RT-qPCR |
| AtPIF5-qR                  | TTCTCCTCTCATTTCTTCT              | RT-qPCR |
| βC1-qF                     | ATCCCACCATTGACTTCAA              | RT-qPCR |

|              |                         |                    |
|--------------|-------------------------|--------------------|
| βC1-qR       | TTCTACTGGGGCTTCTTCCA    | RT-qPCR            |
| Region I-F   | GTAGAGGTTTAGTTCTCGTG    | ChIP-RT-qPCR       |
| Region I-R   | AAGAGTCGAGCTTGGGTCGG    | ChIP-RT-qPCR       |
| Region II-F  | GCACAGTTTAGGCCAATCCT    | ChIP-RT-qPCR       |
| Region II-R  | AAGGTAGATTACTTCCATGG    | ChIP-RT-qPCR       |
| Region III-F | TGTGTGGATAGTAACCTTTT    | ChIP-RT-qPCR       |
| Region III-R | GCAGGAGAGTGGCCATATTG    | ChIP-RT-qPCR       |
| TYLCCNV-qF   | ACAACAACATGAAGGGTTTGGAG | Detect virus titer |
| TYLCCNV-qF   | TGTTGAAGTCGAATGGTGGGA   | Detect virus titer |

---

907

# Fig 1

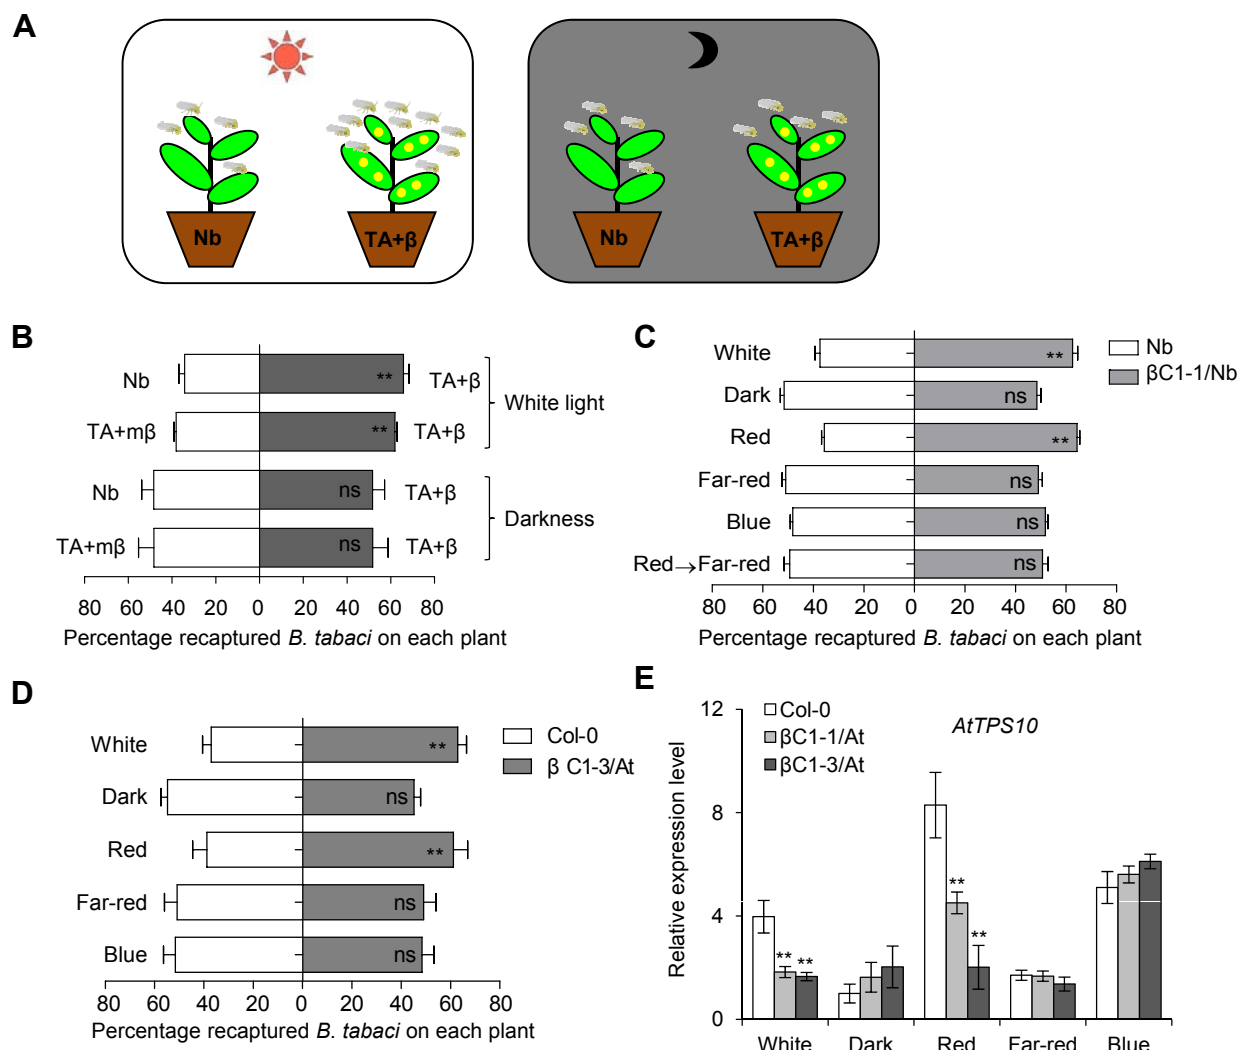

## Fig 2

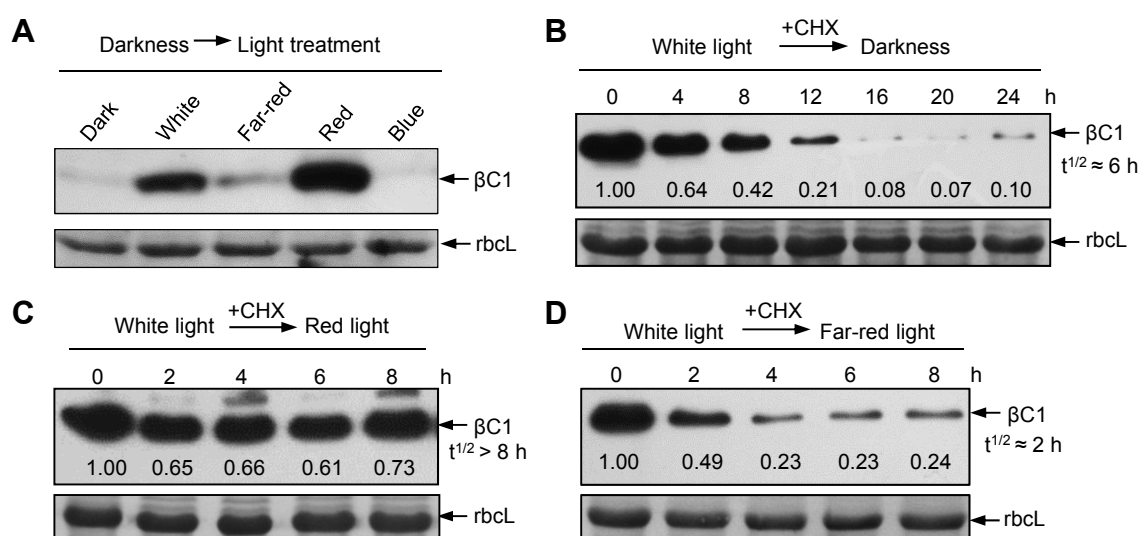



## Fig 3

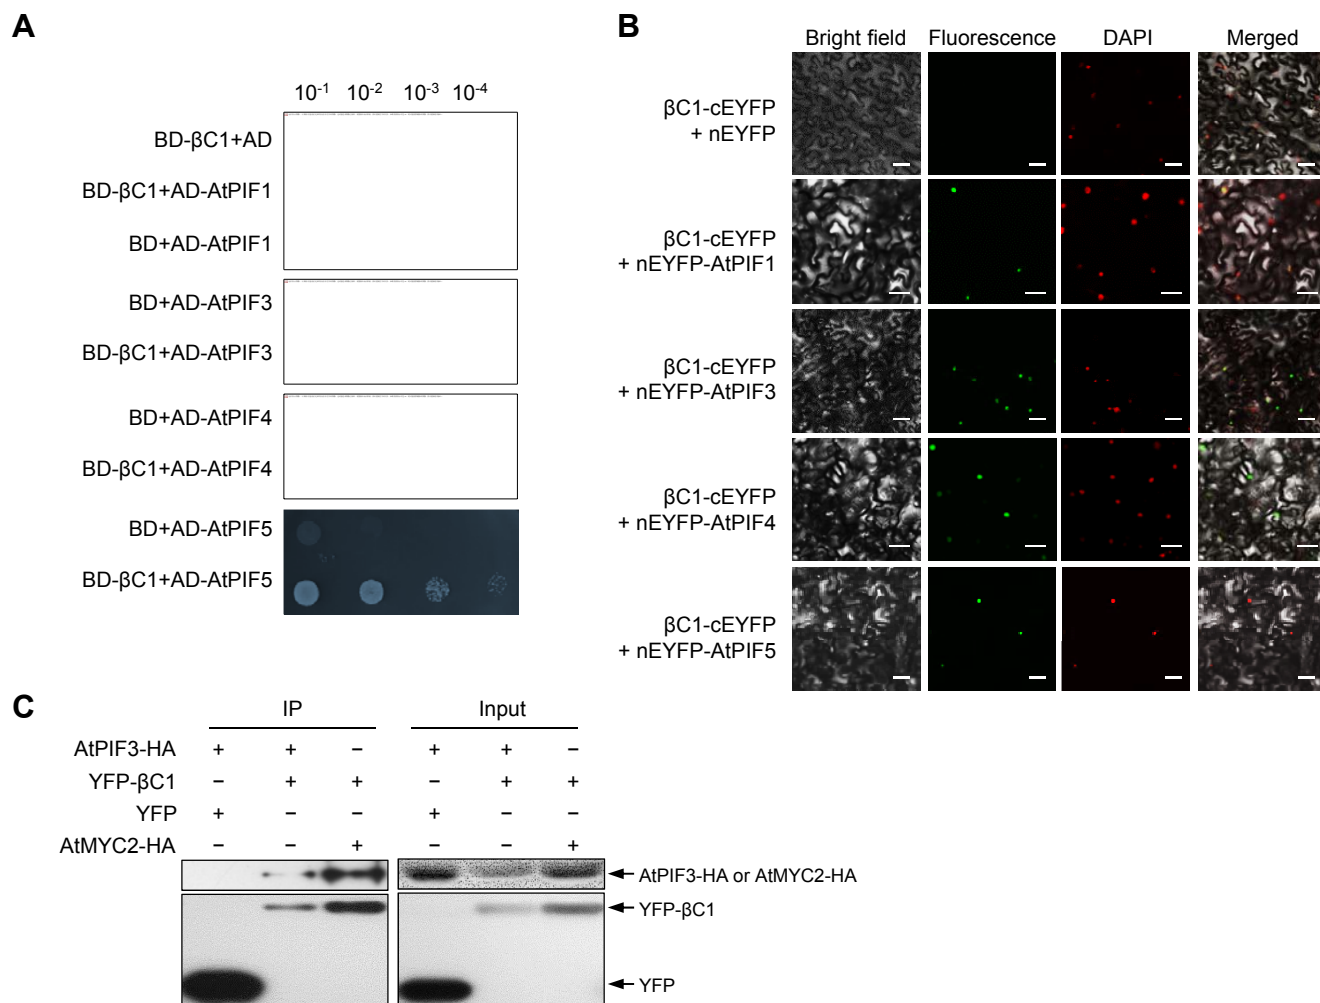

## Fig 4

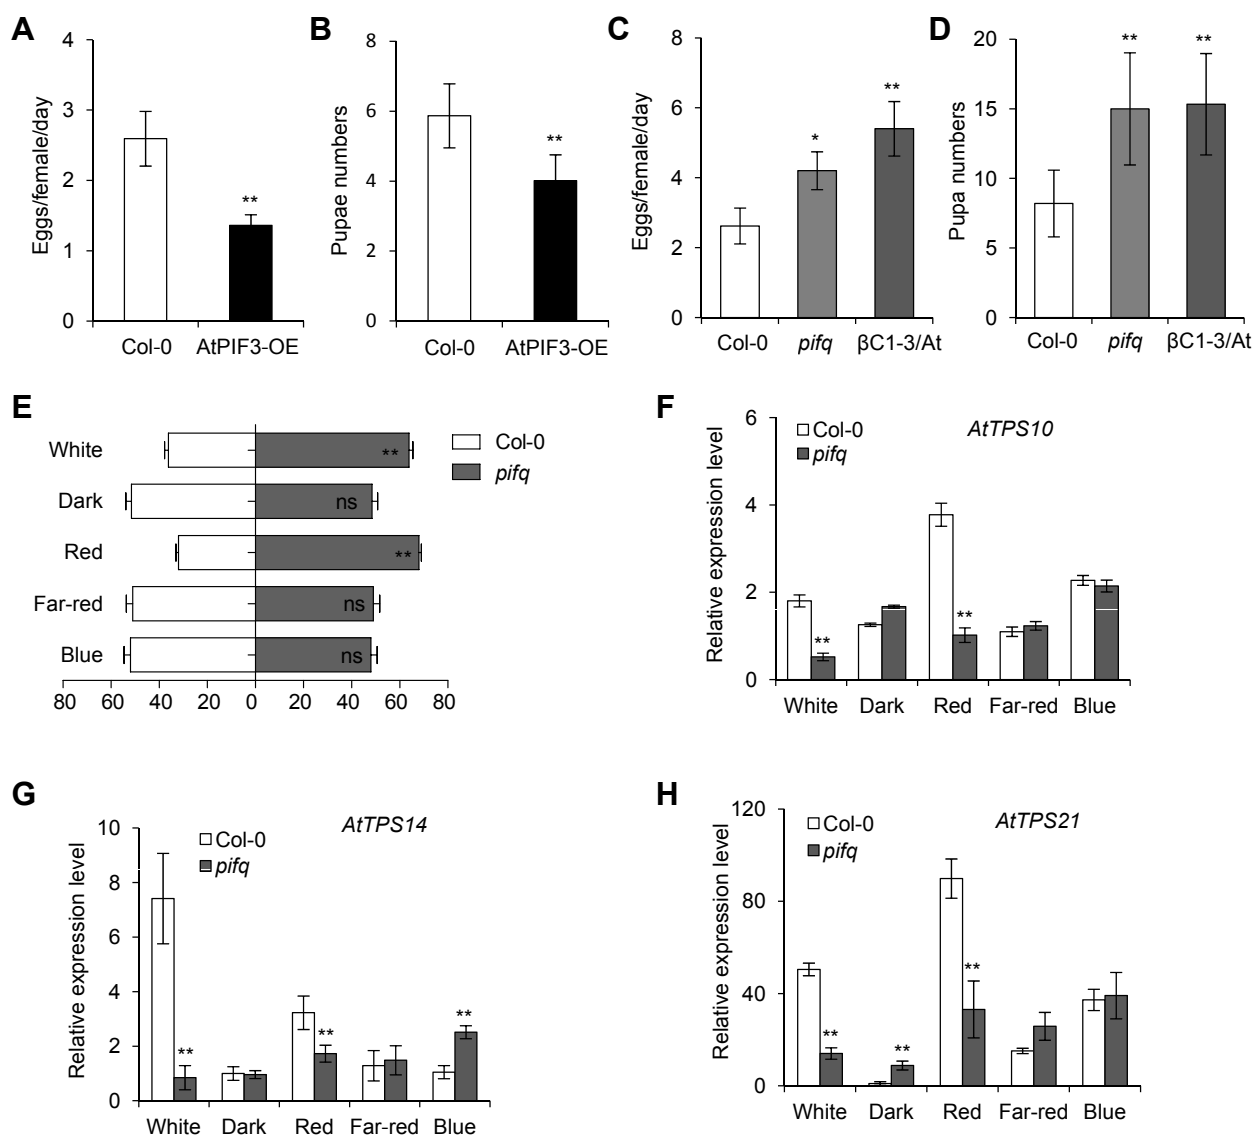

## Fig 5

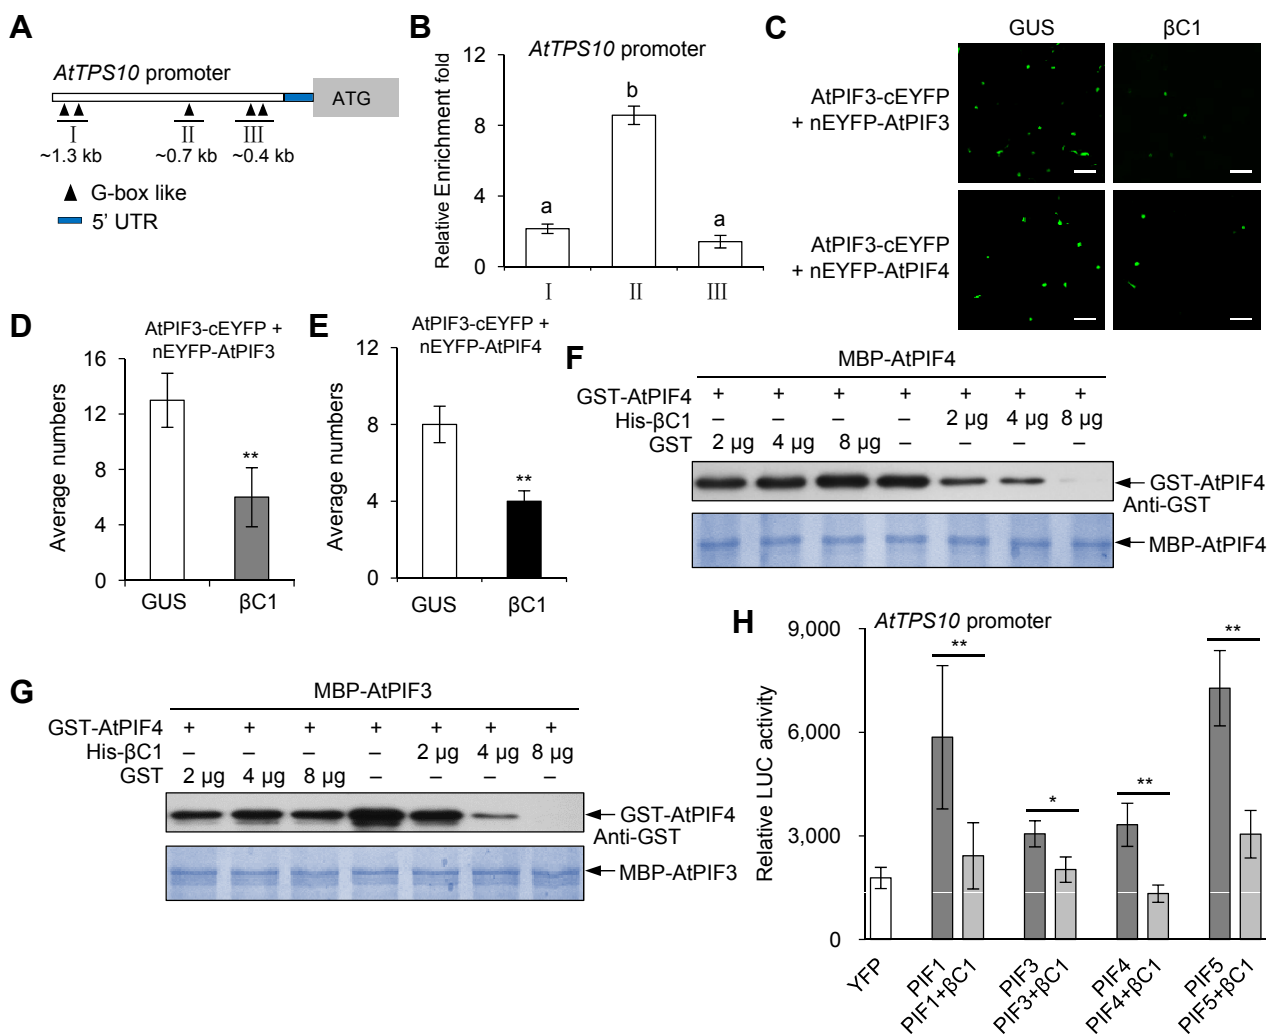

## Fig 6

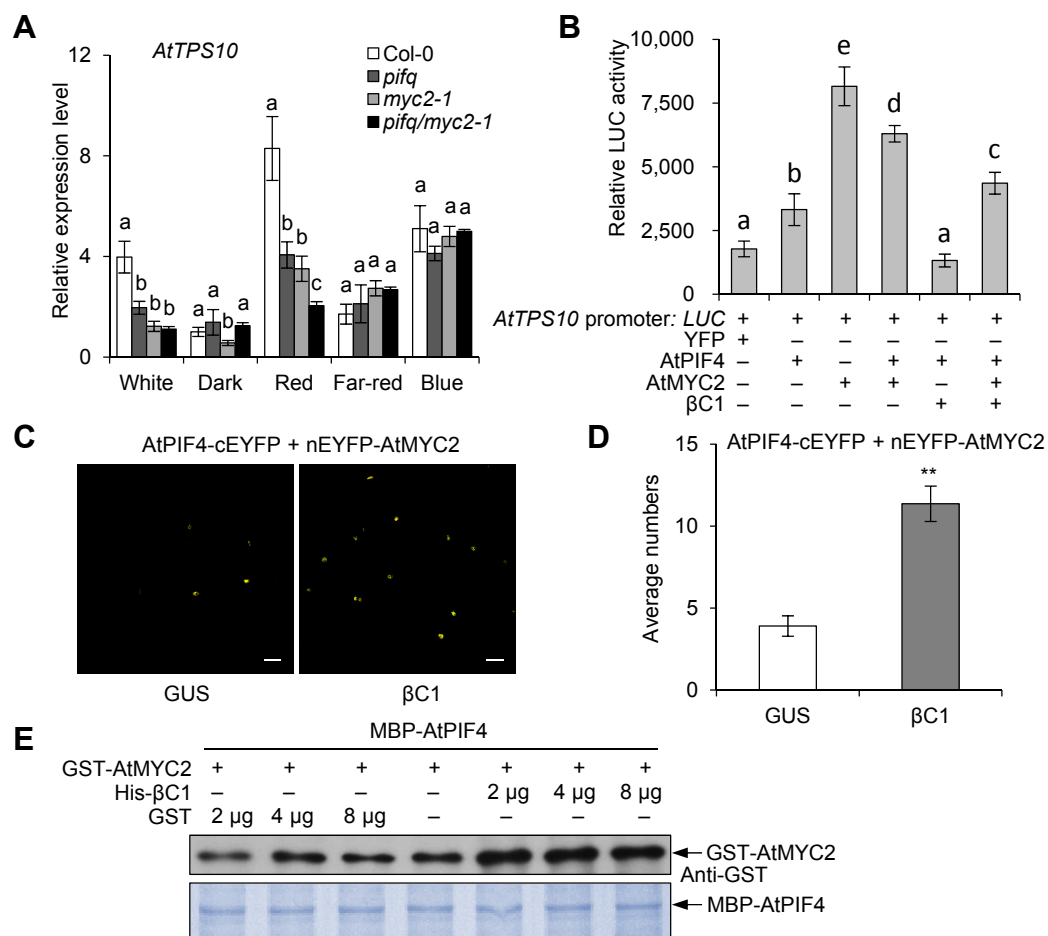

## Fig 7

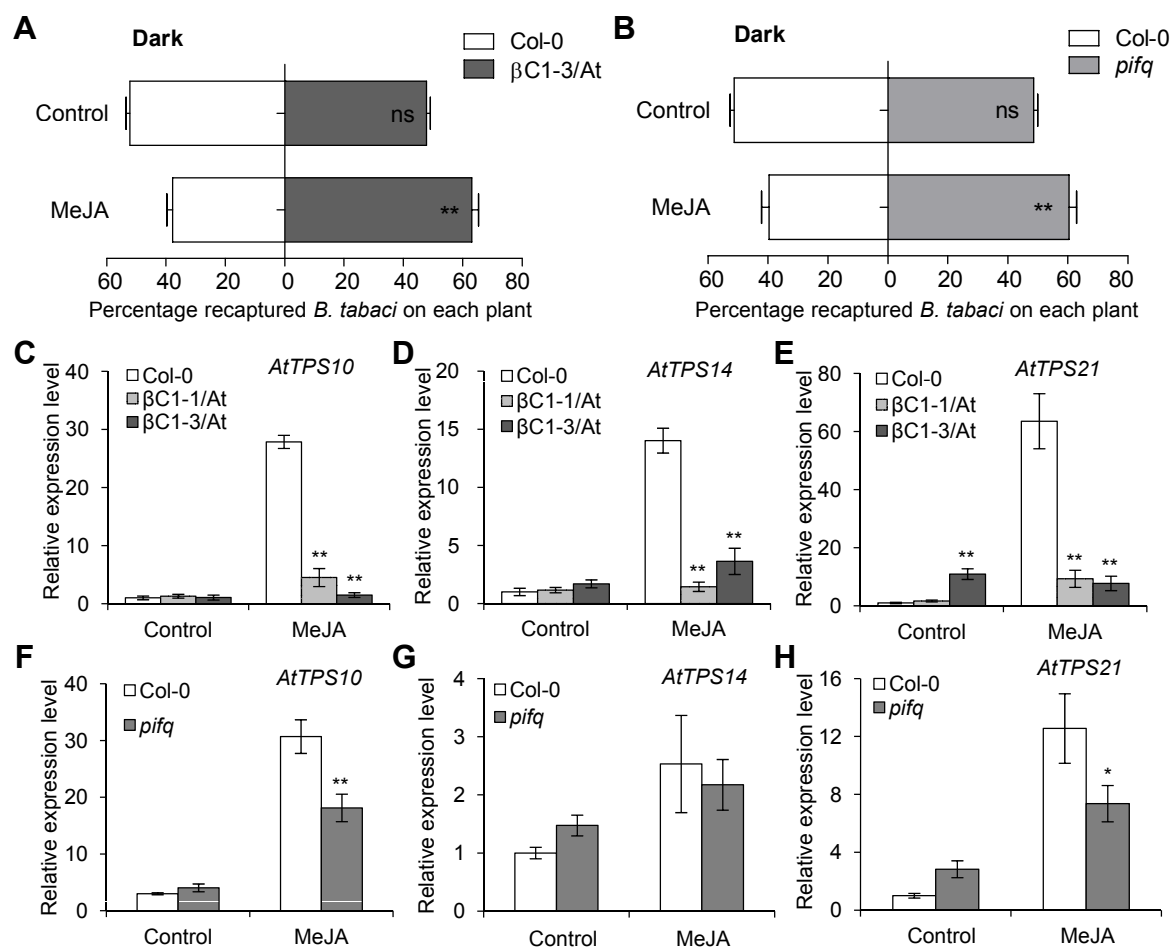

## Supplemental information

## S1 Fig

**A**

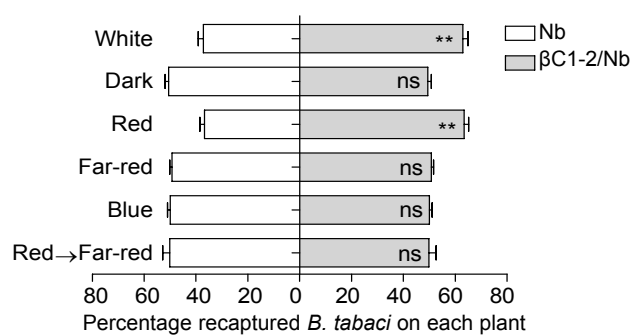

**B**

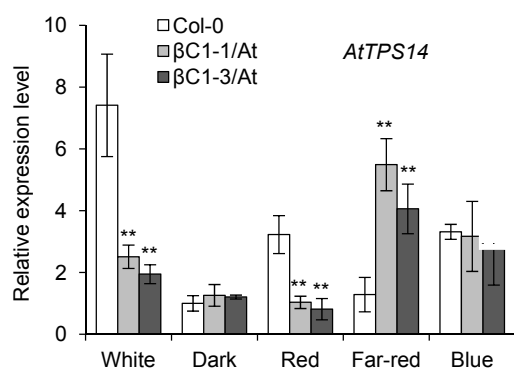

**C**

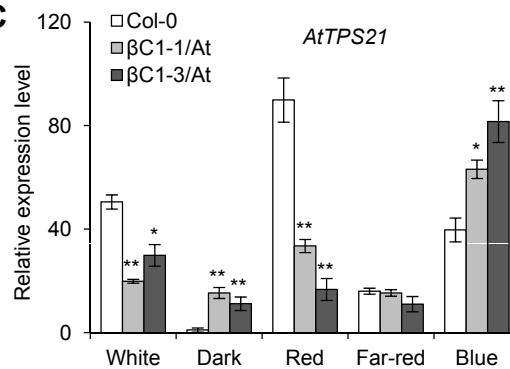

## S2 Fig

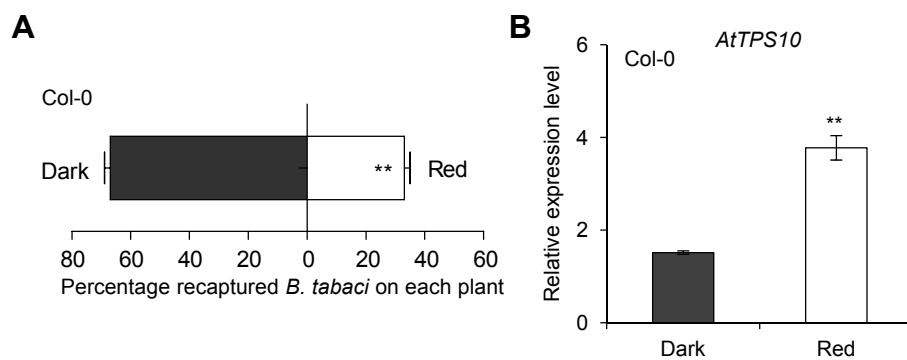



## S3 Fig

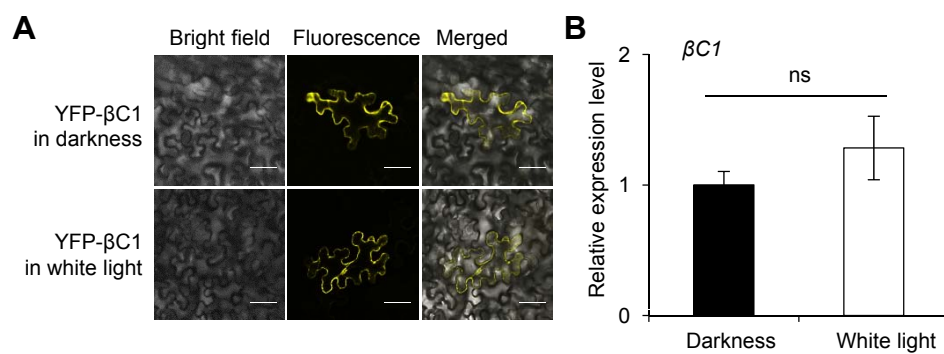

## S4 Fig

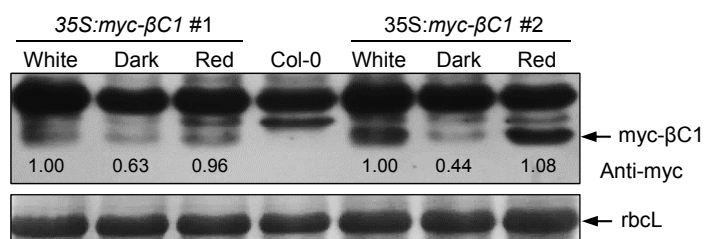

## S5 Fig

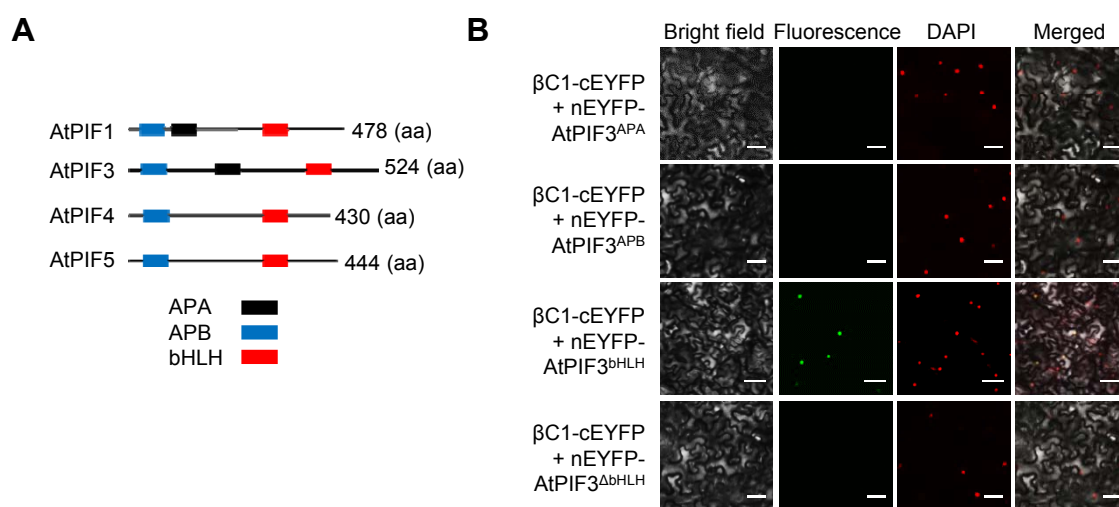

## S6 Fig

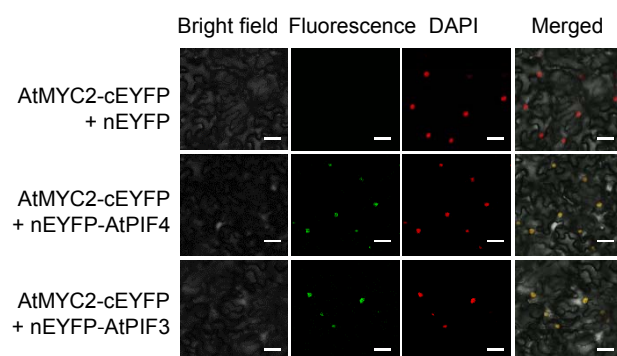

## S7 Fig

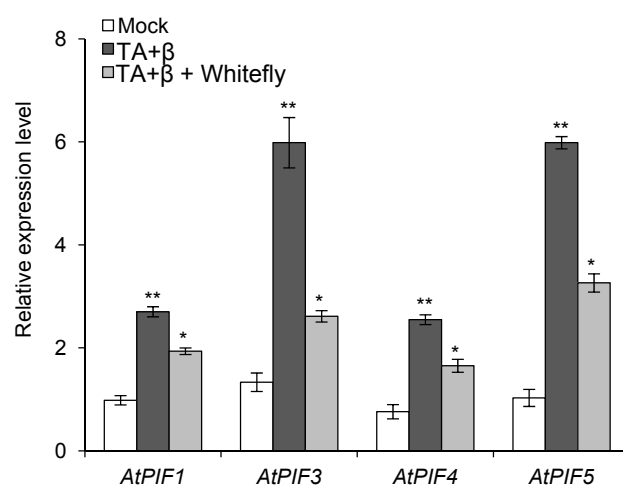

## S8 Fig

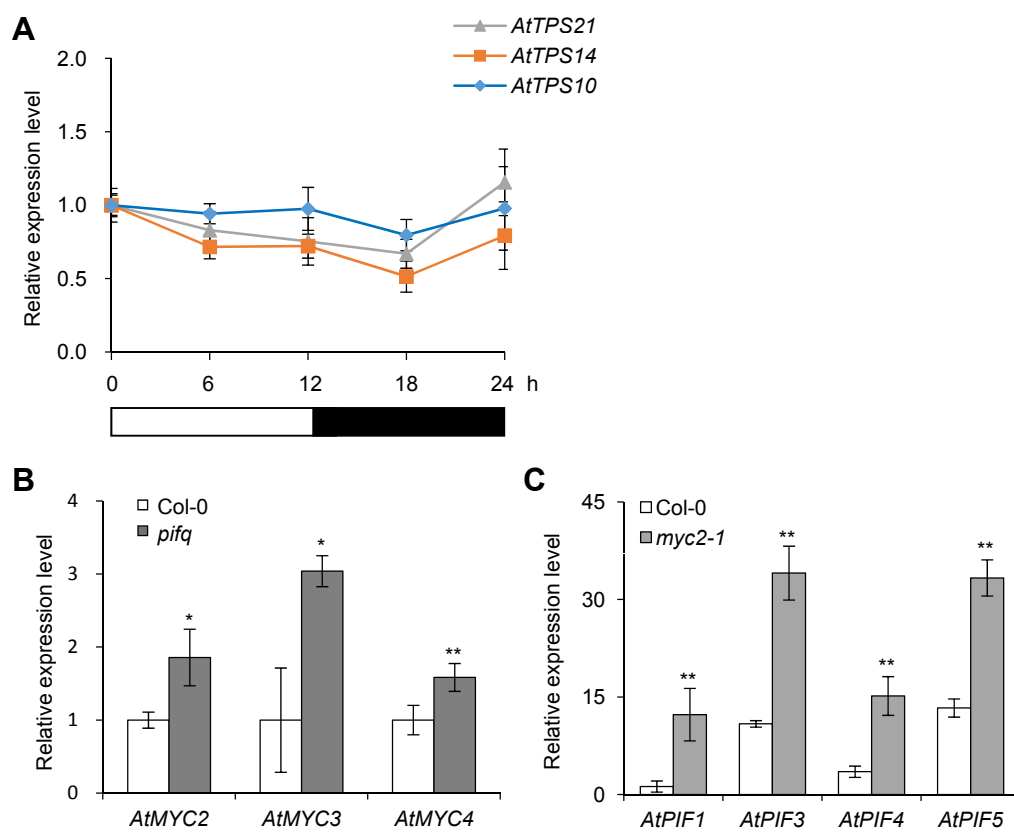

## S9 Fig

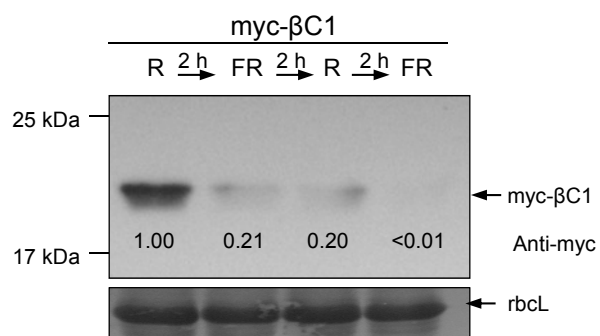

## S10 Fig

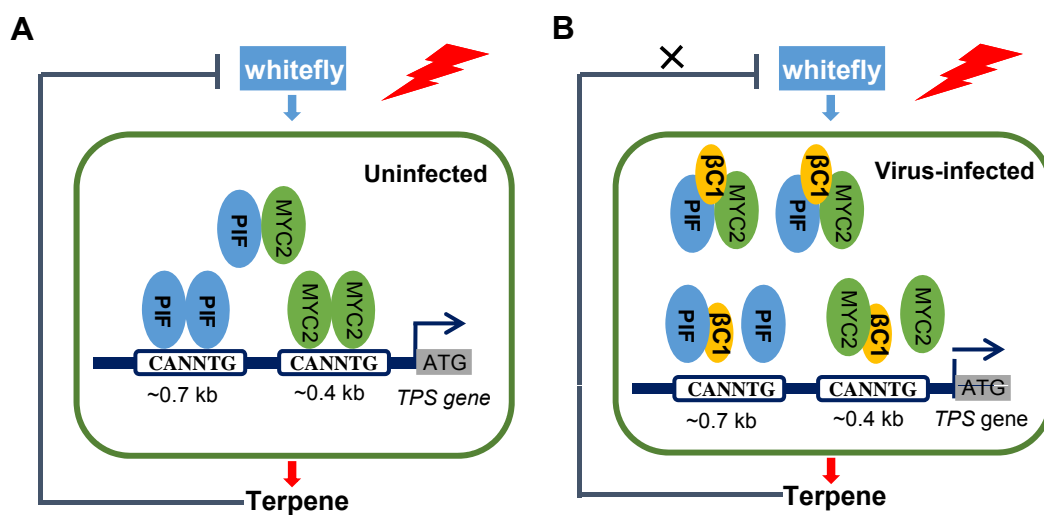

Source: https://www.biorxiv.org/content/10.1101/2020.07.03.186262v1.full.pdf
